# Supplementary material for: Treatments for Moderate-to-Severe Alopecia Areata: A Systematic Narrative Review
Source: PubMed Central journal article supplement — Dermatol Ther (Heidelb). 2023 Oct 13;13(12):2951–91. doi: 10.1007/s13555-023-01044-5 (PMC10689337; doi:10.1007/s13555-023-01044-5), 2023-10-13
Supplement: 13555_2023_1044_MOESM1_ESM.pdf [file 13555_2023_1044_MOESM1_ESM.pdf]

Supplementary Material

**Treatments for moderate-to-severe alopecia  
areata: a systematic narrative review**

**Alexander Egeberg<sup>1,2</sup>, Louise Linsell<sup>3</sup>, Erin Johansson<sup>4</sup>, Frederick  
Durand<sup>4</sup>, Guanglei Yu<sup>4</sup>, Sergio Vañó-Galván<sup>5</sup>**

<sup>1</sup>Department of Dermatology, Bispebjerg Hospital, Copenhagen University,  
Copenhagen, Denmark; <sup>2</sup>Department of Clinical Medicine, University of  
Copenhagen, Copenhagen, Denmark, <sup>3</sup>Visible Analytics, Oxford, UK; <sup>4</sup>Eli Lilly and  
Company Ltd, Indianapolis, IN, USA, <sup>5</sup>Department of Dermatology, Ramon y Cajal  
University Hospital Cajal, IRYCIS, University of Alcala, Madrid, Spain

Alexander Egeberg

Department of Dermatology Bispebjerg University  
Hospital, University of Copenhagen, Copenhagen,  
Denmark

+ 45 38 67 38 67

alexander.egeberg@gmail.com

**Table S1. Search strategies for the SLR**

**A. ProQuest (MEDLINE and Embase)**

| Topic                             | Set | Searched for                                                                                                                                                                                   | Number of hits |              |                     |
|-----------------------------------|-----|------------------------------------------------------------------------------------------------------------------------------------------------------------------------------------------------|----------------|--------------|---------------------|
|                                   |     |                                                                                                                                                                                                | Original SLR   | First update | Second update       |
| Population                        | S1  | (MESH.EXACT("Alopecia Areata") OR EMB.EXACT("alopecia areata") OR TI,AB("alopecia areata" OR "alopecia universalis" OR "alopecia totalis" OR "alopecia circumscripta" OR "alopecia ophiasis")) | 13530          | 14104        | 350 <sup>†</sup>    |
| Randomized controlled trial (RCT) | S2  | (TI,AB(clinical AND (trial or study or studies)))                                                                                                                                              | 5313903        | 5589677      | 202113 <sup>‡</sup> |
|                                   | S3  | (TI,AB(random*) OR TI,AB,IF(placebo*) OR TI,AB(double NEAR/1 blind*))                                                                                                                          | 3178314        | 3312201      | 99754 <sup>‡</sup>  |
|                                   | S4  | (TI,AB(random*) OR TI,AB,IF(placebo*) OR TI,AB(sham))                                                                                                                                          | 3298384        | 3436335      | 102138 <sup>‡</sup> |
|                                   | S5  | TI,AB("RCT")                                                                                                                                                                                   | 67719          | 72498        | 2501 <sup>†</sup>   |
|                                   | S6  | (TI,AB(random*AND (trial or study or studies)))                                                                                                                                                | 13             | 15           | 0 <sup>†</sup>      |
|                                   | S7  | TI,AB(open-label)                                                                                                                                                                              | 135030         | 143420       | 5892 <sup>‡</sup>   |
|                                   | S8  | (TI,AB((singl* OR doubl* OR treb* or tripl*) NEAR/1 (blind[*3] OR mask[*3])))                                                                                                                  | 441798         | 454322       | 9287 <sup>‡</sup>   |
|                                   | S9  | (TI,AB((singl* OR doubl* OR treb* or tripl*) NEAR/1 (blind[*3] OR mask[*3] OR dumm*)))                                                                                                         | 442172         | 454697       | 9292 <sup>‡</sup>   |
|                                   | S10 | (TI,AB(placebo[*1]) OR TI,AB("placebo controlled"))                                                                                                                                            | 558672         | 575377       | 12063 <sup>‡</sup>  |
|                                   | S11 | (TI,AB(random* NEAR/2 allocated))                                                                                                                                                              | 79174          | 82605        | 1765 <sup>†</sup>   |
|                                   | S12 | (EMB.EXACT.EXPLODE("Clinical trial"))                                                                                                                                                          | 1801505        | 1861451      | 42556 <sup>‡</sup>  |
|                                   | S13 | (EMB.EXACT("Controlled clinical trial"))                                                                                                                                                       | 535073         | 535978       | 886 <sup>†</sup>    |
|                                   | S14 | (EMB.EXACT("Randomized controlled trial"))                                                                                                                                                     | 710239         | 739870       | 20898 <sup>‡</sup>  |
|                                   | S15 | EMB.EXACT.EXPLODE("Randomization")                                                                                                                                                             | 103491         | 105311       | 1327 <sup>†</sup>   |
|                                   | S16 | (EMB.EXACT("Single blind procedure"))                                                                                                                                                          | 48070          | 50055        | 1478 <sup>†</sup>   |
|                                   | S17 | (EMB.EXACT("Double blind procedure"))                                                                                                                                                          | 191852         | 198480       | 4304 <sup>†</sup>   |
|                                   | S18 | (EMB.EXACT("Crossover procedure"))                                                                                                                                                             | 72092          | 74092        | 1312 <sup>†</sup>   |
|                                   | S19 | EMB.EXACT("Placebo")                                                                                                                                                                           | 411021         | 420968       | 6786 <sup>‡</sup>   |
|                                   | S20 | (EMB.EXACT("Triple blind procedure"))                                                                                                                                                          | 335            | 361          | 22 <sup>†</sup>     |
|                                   | S21 | (EMB.EXACT("Multicenter study" OR "Phase 3 clinical trial" OR "Phase 4 clinical trial"))                                                                                                       | 356443         | 381062       | 17578 <sup>‡</sup>  |
|                                   | S22 | (EMB.EXACT("Prospective study"))                                                                                                                                                               | 728300         | 776782       | 32299 <sup>‡</sup>  |
|                                   | S23 | (MESH.EXACT.EXPLODE("Randomized Controlled Trials as Topic" OR "Randomized Controlled Trial") OR MESH.EXACT.EXPLODE("Clinical Trials as Topic"))                                               | 360057         | 369952       | 3737 <sup>†</sup>   |
|                                   | S24 | (MESH.EXACT.EXPLODE("Random Allocation"))                                                                                                                                                      | 105541         | 106530       | 128 <sup>†</sup>    |
|                                   | S25 | (MESH.EXACT.EXPLODE("Double-Blind Method"))                                                                                                                                                    | 165561         | 169828       | 1767 <sup>†</sup>   |
|                                   | S26 | (MESH.EXACT.EXPLODE("Single-Blind Method"))                                                                                                                                                    | 30453          | 31560        | 366 <sup>†</sup>    |
|                                   | S27 | MESH.EXACT.EXPLODE("Placebos")                                                                                                                                                                 | 38344          | 38969        | 143 <sup>†</sup>    |
|                                   | S28 | (MESH.EXACT.EXPLODE("Cross-Over Studies"))                                                                                                                                                     | 50737          | 52714        | 733 <sup>†</sup>    |
|                                   | S29 | (MESH.EXACT.EXPLODE("Prospective Studies"))                                                                                                                                                    | 583651         | 613716       | 14553 <sup>‡</sup>  |

| Topic               | Set | Searched for                                                                                                                                                                                                                                                     | Number of hits |              |                     |
|---------------------|-----|------------------------------------------------------------------------------------------------------------------------------------------------------------------------------------------------------------------------------------------------------------------|----------------|--------------|---------------------|
|                     |     |                                                                                                                                                                                                                                                                  | Original SLR   | First update | Second update       |
|                     | S30 | (RTYPE("Clinical trial, phase i"))                                                                                                                                                                                                                               | 21869          | 23119        | 522 <sup>†</sup>    |
|                     | S31 | (RTYPE("Clinical trial, phase ii"))                                                                                                                                                                                                                              | 35227          | 36973        | 825 <sup>†</sup>    |
|                     | S32 | (RTYPE("Clinical trial, phase iii"))                                                                                                                                                                                                                             | 18630          | 19870        | 566 <sup>†</sup>    |
|                     | S33 | (RTYPE("Clinical trial, phase iv"))                                                                                                                                                                                                                              | 2129           | 2265         | 50 <sup>†</sup>     |
|                     | S34 | (RTYPE("Controlled clinical trial"))                                                                                                                                                                                                                             | 94268          | 94679        | 198 <sup>†</sup>    |
|                     | S35 | (RTYPE("Randomized controlled trial"))                                                                                                                                                                                                                           | 537848         | 560350       | 12008 <sup>‡</sup>  |
|                     | S36 | (RTYPE("Multicenter study"))                                                                                                                                                                                                                                     | 298166         | 314412       | 6128 <sup>‡</sup>   |
|                     | S37 | (RTYPE("Clinical trial"))                                                                                                                                                                                                                                        | 613493         | 623696       | 4373 <sup>†</sup>   |
|                     | S38 | (RTYPE("Pragmatic Clinical Trial"))                                                                                                                                                                                                                              | 1782           | 2016         | 63 <sup>†</sup>     |
|                     | S39 | (EMB.EXACT.EXPLODE("controlled study"))                                                                                                                                                                                                                          | 8587346        | 8971759      | 292655 <sup>‡</sup> |
|                     | S40 | (S2 OR S3 OR S4 OR S5 OR S6 OR S7 OR S8 OR S9 OR S10 OR S11 OR S12 OR S13 OR S14 OR S15 OR S16 OR S17 OR S18 OR S19 OR S20 OR S21 OR S22 OR S23 OR S24 OR S25 OR S26 OR S27 OR S28 OR S29 OR S30 OR S31 OR S32 OR S33 OR S34 OR S35 OR S36 OR S37 OR S38 OR S39) | 15994795       | 16681333     | 502721 <sup>‡</sup> |
| Observational study | S41 | (TI,AB("Case control") OR TI,AB(case control NEAR/1 (study OR studies)))                                                                                                                                                                                         | 321138         | 334884       | 9901 <sup>†</sup>   |
|                     | S42 | (Cohort NEAR/1 (study OR studies))                                                                                                                                                                                                                               | 915164         | 937751       | 47144 <sup>‡</sup>  |
|                     | S43 | (TI,AB(Cohort analys*))                                                                                                                                                                                                                                          | 773608         | 837166       | 48252 <sup>‡</sup>  |
|                     | S44 | (TI,AB(Follow up NEAR/1 (study OR studies)))                                                                                                                                                                                                                     | 144053         | 148548       | 2278 <sup>†</sup>   |
|                     | S45 | (TI,AB(Observational NEAR/1 (study OR studies)))                                                                                                                                                                                                                 | 380152         | 411718       | 23907 <sup>‡</sup>  |
|                     | S46 | (TI,AB("Cross sectional") OR TI,AB(cross sectional NEAR/1 (study OR studies)))                                                                                                                                                                                   | 931140         | 1000478      | 52440 <sup>‡</sup>  |
|                     | S47 | (TI,AB(Epidemiologic[*1] NEAR/1 (study OR studies)))                                                                                                                                                                                                             | 64077          | 65254        | 557 <sup>†</sup>    |
|                     | S48 | TI,AB(Longitudinal)                                                                                                                                                                                                                                              | 640183         | 675568       | 26670 <sup>‡</sup>  |
|                     | S49 | TI,AB(Retrospective)                                                                                                                                                                                                                                             | 1597941        | 1706112      | 82759 <sup>‡</sup>  |
|                     | S50 | (EMB.EXACT("Clinical study"))                                                                                                                                                                                                                                    | 311625         | 311183       | 1042 <sup>†</sup>   |
|                     | S51 | (EMB.EXACT("Family study"))                                                                                                                                                                                                                                      | 45567          | 45386        | 62 <sup>†</sup>     |
|                     | S52 | (EMB.EXACT("Longitudinal study"))                                                                                                                                                                                                                                | 170261         | 180072       | 6555 <sup>‡</sup>   |
|                     | S53 | (EMB.EXACT("Retrospective study"))                                                                                                                                                                                                                               | 1119561        | 1219476      | 67976 <sup>‡</sup>  |
|                     | S54 | (EMB.EXACT("Prospective study") NOT EMB.EXACT("Randomized controlled trials"))                                                                                                                                                                                   | 728300         | 776782       | 32299 <sup>‡</sup>  |
|                     | S55 | (EMB.EXACT("Cohort analysis"))                                                                                                                                                                                                                                   | 753098         | 831764       | 56388 <sup>‡</sup>  |
|                     | S56 | (EMB.EXACT("Case control study"))                                                                                                                                                                                                                                | 189407         | 198892       | 5048 <sup>‡</sup>   |
|                     | S57 | (EMB.EXACT("Follow up"))                                                                                                                                                                                                                                         | 1855137        | 1945857      | 63094 <sup>‡</sup>  |
|                     | S58 | (EMB.EXACT("Observational study"))                                                                                                                                                                                                                               | 254938         | 278048       | 15830 <sup>‡</sup>  |
|                     | S59 | EMB.EXACT("Epidemiology")                                                                                                                                                                                                                                        | 1383964        | 1426844      | 20869 <sup>‡</sup>  |
|                     | S60 | (EMB.EXACT("Cross-sectional study"))                                                                                                                                                                                                                             | 430622         | 472220       | 25010 <sup>‡</sup>  |
|                     | S61 | (EMB.EXACT("Disease registry"))                                                                                                                                                                                                                                  | 16945          | 18170        | 762 <sup>†</sup>    |
|                     | S62 | (MESH.EXACT("Epidemiologic studies"))                                                                                                                                                                                                                            | 8730           | 8988         | 101 <sup>†</sup>    |
|                     | S63 | (MESH.EXACT.EXPLODE("Case control studies"))                                                                                                                                                                                                                     | 303839         | 316479       | 3356 <sup>†</sup>   |
|                     | S64 | (MESH.EXACT.EXPLODE("Cohort studies"))                                                                                                                                                                                                                           | 2168608        | 2290730      | 60730 <sup>‡</sup>  |
|                     | S65 | (MESH.EXACT("Cross-sectional studies"))                                                                                                                                                                                                                          | 375420         | 410133       | 17952 <sup>‡</sup>  |
|                     | S66 | (MESH.EXACT("Longitudinal Studies"))                                                                                                                                                                                                                             | 147097         | 154860       | 3048 <sup>†</sup>   |
|                     | S67 | (MESH.EXACT("Retrospective Studies"))                                                                                                                                                                                                                            | 917648         | 991638       | 39958 <sup>‡</sup>  |

| Topic                                  | Set | Searched for                                                                                                                                                                                                                                                                                                                                                                                                                                                                                                                                                                                                                                                                                                                                                                                                                                                                                                                                                                                                                                                                                                                                                                                                                                                                                                                                                                                                                                                                                           | Number of hits |              |                     |
|----------------------------------------|-----|--------------------------------------------------------------------------------------------------------------------------------------------------------------------------------------------------------------------------------------------------------------------------------------------------------------------------------------------------------------------------------------------------------------------------------------------------------------------------------------------------------------------------------------------------------------------------------------------------------------------------------------------------------------------------------------------------------------------------------------------------------------------------------------------------------------------------------------------------------------------------------------------------------------------------------------------------------------------------------------------------------------------------------------------------------------------------------------------------------------------------------------------------------------------------------------------------------------------------------------------------------------------------------------------------------------------------------------------------------------------------------------------------------------------------------------------------------------------------------------------------------|----------------|--------------|---------------------|
|                                        |     |                                                                                                                                                                                                                                                                                                                                                                                                                                                                                                                                                                                                                                                                                                                                                                                                                                                                                                                                                                                                                                                                                                                                                                                                                                                                                                                                                                                                                                                                                                        | Original SLR   | First update | Second update       |
|                                        | S68 | (MESH.EXACT("Prospective Studies"))                                                                                                                                                                                                                                                                                                                                                                                                                                                                                                                                                                                                                                                                                                                                                                                                                                                                                                                                                                                                                                                                                                                                                                                                                                                                                                                                                                                                                                                                    | 583651         | 613716       | 14553 <sup>‡</sup>  |
|                                        | S69 | (MESH.EXACT("Follow-Up Studies"))                                                                                                                                                                                                                                                                                                                                                                                                                                                                                                                                                                                                                                                                                                                                                                                                                                                                                                                                                                                                                                                                                                                                                                                                                                                                                                                                                                                                                                                                      | 665990         | 680697       | 3432 <sup>†</sup>   |
|                                        | S70 | (MESH("Observational Studies"))                                                                                                                                                                                                                                                                                                                                                                                                                                                                                                                                                                                                                                                                                                                                                                                                                                                                                                                                                                                                                                                                                                                                                                                                                                                                                                                                                                                                                                                                        | 6532           | 7445         | 390 <sup>†</sup>    |
|                                        | S71 | (S41 OR S42 OR S43 OR S44 OR S45 OR S46 OR S47 OR S48 OR S49 OR S50 OR S51 OR S52 OR S53 OR S54 OR S55 OR S56 OR S57 OR S58 OR S59 OR S60 OR S61 OR S62 OR S63 OR S64 OR S65 OR S66 OR S67 OR S68 OR S69 OR S70)                                                                                                                                                                                                                                                                                                                                                                                                                                                                                                                                                                                                                                                                                                                                                                                                                                                                                                                                                                                                                                                                                                                                                                                                                                                                                       | 9624986        | 10089542     | 333806 <sup>‡</sup> |
| RCT + Observational study              | S72 | (S40 OR S71)                                                                                                                                                                                                                                                                                                                                                                                                                                                                                                                                                                                                                                                                                                                                                                                                                                                                                                                                                                                                                                                                                                                                                                                                                                                                                                                                                                                                                                                                                           | 20874134       | 21743446     | 637918 <sup>‡</sup> |
| Population + RCT + Observational study | S73 | (S1 AND S72)                                                                                                                                                                                                                                                                                                                                                                                                                                                                                                                                                                                                                                                                                                                                                                                                                                                                                                                                                                                                                                                                                                                                                                                                                                                                                                                                                                                                                                                                                           | 5069           | 5366         | 215 <sup>†</sup>    |
| Interventions <sup>§</sup>             | S74 | ALL("corticosteroid" OR "desoximetasone" OR "clobetasol" OR "triamcinolone" OR "hydrocortisone" OR "intralesional steroid*" OR "systemic corticosteroid*" OR "prednisolone" OR "methylprednisolone" OR "dexamethasone" OR "Contact immunotherapy" OR "1-chloro,2,4,dinitrobenzene" OR "DNCB" OR "squaric acid dibutyl ester" OR "SADBE" OR "2,3-diphenylcyclopropenone" OR "DPCP" OR "photochemotherapy" OR "psoralen" OR "ultraviolet" OR "PUVA" OR "minoxidil" OR "dithranol" OR "anthralin" OR "Calcineurin inhibitor*" OR "ciclosporin" OR "tacrolimus" OR "latanoprost" OR "bimatoprost" OR "etanercept" OR "alefacept" OR "sulfasalazine" OR "methotrexate" OR "Isoprinosine" OR "laser" OR "aromatherapy" OR "hypnotherapy" OR "baricitinib" OR "tofacitinib" OR "ruxolitinib" OR "PF-06651600" OR "ritilecitinib" OR "CTP-543" OR "methotrexate" OR "cyclosporine" OR "azathioprine" OR "topical immunotherapy" OR "prednisone" OR "betamethasone" OR "glucocorticoid*" OR "topical corticosteroid*" OR "monoclonal antibody" OR "TNF inhibitor*" OR "anti-TNF" OR "biologic*" OR "Janus kinase inhibitor*" OR "JAK inhibitor*" OR "bexarotene" OR "pimecrolimus" OR "prostaglandin F2alpha" OR "diphencyprone" OR "308-nm" OR "excimer" OR "PDE4 inhibitor" OR "phosphodiesterase 4 inhibitor" OR "phosphodiesterase IV inhibitor" OR "mycophenolate mofetil" OR "ustekinumab" OR "Interleukin 17 inhibitor" OR "dapsone" OR "simvastatin" OR "ezetimibe" OR "sulfasalazine" OR "apremilast") | 8530446        | 8776670      | 199482 <sup>‡</sup> |
|                                        | S75 | (MESH.EXACT.EXPLODE("corticosteroid") OR (MESH.EXACT.EXPLODE("intralesional drug administration")) OR (MESH.EXACT.EXPLODE("Adrenal Cortex Hormones")) OR MESH.EXACT.EXPLODE("Immunotherapy") OR MESH.EXACT.EXPLODE("Photochemotherapy") OR (MESH.EXACT.EXPLODE("Calcineurin Inhibitors")) OR MESH.EXACT.EXPLODE("Aromatherapy") OR MESH.EXACT.EXPLODE("Hypnosis") OR (MESH.EXACT.EXPLODE("Biological Products"))) OR (MESH.EXACT.EXPLODE("Antibodies, Monoclonal")) OR (MESH.EXACT.EXPLODE("Tumor Necrosis Factor Inhibitors")) OR                                                                                                                                                                                                                                                                                                                                                                                                                                                                                                                                                                                                                                                                                                                                                                                                                                                                                                                                                                     | 1545934        | 1599061      | 28475 <sup>‡</sup>  |

| Topic | Set | Searched for                                                                                                                                                                                                                                                                                                                                                                                                                                                                                                                                                                                                                                                                                                                                                                                                                                                                                                                                                                                                                                                                                                                                                                                                                                                                                                                                                                                                                                                                                                                                                                             | Number of hits |              |                    |
|-------|-----|------------------------------------------------------------------------------------------------------------------------------------------------------------------------------------------------------------------------------------------------------------------------------------------------------------------------------------------------------------------------------------------------------------------------------------------------------------------------------------------------------------------------------------------------------------------------------------------------------------------------------------------------------------------------------------------------------------------------------------------------------------------------------------------------------------------------------------------------------------------------------------------------------------------------------------------------------------------------------------------------------------------------------------------------------------------------------------------------------------------------------------------------------------------------------------------------------------------------------------------------------------------------------------------------------------------------------------------------------------------------------------------------------------------------------------------------------------------------------------------------------------------------------------------------------------------------------------------|----------------|--------------|--------------------|
|       |     |                                                                                                                                                                                                                                                                                                                                                                                                                                                                                                                                                                                                                                                                                                                                                                                                                                                                                                                                                                                                                                                                                                                                                                                                                                                                                                                                                                                                                                                                                                                                                                                          | Original SLR   | First update | Second update      |
|       |     | (MESH.EXACT.EXPLODE("Janus Kinase Inhibitors")) OR<br>MESH.EXACT.EXPLODE("Dinoprost") OR<br>(MESH.EXACT.EXPLODE("Dinitrochlorobenzene ") OR (MESH.EXACT.EXPLODE("PUVA Therapy")) OR<br>MESH.EXACT.EXPLODE("Minoxidil") OR<br>MESH.EXACT.EXPLODE("Anthralin") OR<br>MESH.EXACT.EXPLODE("Cyclosporine") OR<br>MESH.EXACT.EXPLODE("Tacrolimus") OR<br>MESH.EXACT.EXPLODE("Latanoprost") OR<br>MESH.EXACT.EXPLODE("Bimatoprost") OR<br>MESH.EXACT.EXPLODE("Etanercept") OR<br>MESH.EXACT.EXPLODE("Alefacept") OR<br>(MESH.EXACT.EXPLODE("Sulfasalazine") OR<br>MESH.EXACT.EXPLODE("Methotrexate") OR<br>(MESH.EXACT.EXPLODE("Inosine Pranobex")) OR (MESH.EXACT.EXPLODE("Lasers, Excimer")) OR<br>MESH.EXACT.EXPLODE("Azathioprine") OR<br>MESH.EXACT.EXPLODE("Glucocorticoids") OR<br>MESH.EXACT.EXPLODE("Bexarotene") OR<br>MESH.EXACT.EXPLODE("betamethasone") OR<br>MESH.EXACT.EXPLODE("prednisone") OR<br>MESH.EXACT.EXPLODE("clobetasol") OR<br>MESH.EXACT.EXPLODE("triamcinolone") OR<br>MESH.EXACT.EXPLODE("hydrocortisone") OR<br>MESH.EXACT.EXPLODE("prednisolone") OR<br>MESH.EXACT.EXPLODE("methylprednisolone") OR MESH.EXACT.EXPLODE("dexamethasone") OR<br>(MESH.EXACT.EXPLODE("Phosphodiesterase 4 Inhibitors")) OR<br>MESH.EXACT.EXPLODE("desoximetasone") OR<br>MESH.EXACT.EXPLODE("Mycophenolic Acid") OR MESH.EXACT.EXPLODE("Ustekinumab") OR MESH.EXACT.EXPLODE("Dapsone") OR<br>MESH.EXACT.EXPLODE("Simvastatin") OR<br>MESH.EXACT.EXPLODE("Ezetimibe, Simvastatin Drug Combination") OR<br>MESH.EXACT.EXPLODE("Ezetimibe") OR<br>MESH.EXACT.EXPLODE("Sulfasalazine")) |                |              |                    |
|       | S76 | ((EMB.EXACT.EXPLODE("Janus kinase inhibitor")) OR<br>(EMB.EXACT.EXPLODE("calcineurin inhibitor")) OR (EMB.EXACT.EXPLODE("prostaglandin F2 alpha")) OR<br>EMB.EXACT.EXPLODE("corticosteroid") OR<br>(EMB.EXACT.EXPLODE("intralesional drug administration")) OR<br>EMB.EXACT.EXPLODE("desoximetasone") OR<br>EMB.EXACT.EXPLODE("immunotherapy") OR<br>EMB.EXACT.EXPLODE("photochemotherapy") OR EMB.EXACT.EXPLODE("aromatherapy") OR<br>EMB.EXACT.EXPLODE("hypnosis") OR<br>(EMB.EXACT.EXPLODE("biological product")) OR (EMB.EXACT.EXPLODE("monoclonal antibody")) OR<br>(EMB.EXACT.EXPLODE("clobetasol propionate")) OR<br>EMB.EXACT.EXPLODE("triamcinolone") OR<br>(EMB.EXACT.EXPLODE("hydrocortisone acetate")) OR<br>EMB.EXACT.EXPLODE("prednisolone") OR<br>EMB.EXACT.EXPLODE("methylprednisolone") OR EMB.EXACT.EXPLODE("dexamethasone") OR (EMB.EXACT.EXPLODE("1 chloro 2,4 dinitrobenzene")) OR<br>(EMB.EXACT.EXPLODE("squaric acid dibutyl                                                                                                                                                                                                                                                                                                                                                                                                                                                                                                                                                                                                                                      | 2878504        | 2995170      | 73909 <sup>‡</sup> |

| Topic                                               | Set | Searched for                                                                                                                                                                                                                                                                                                                                                                                                                                                                                                                                                                                                                                                                                                                                                                                                                                                                                                                                                                                                                                                                                                                                                                                                                                                                                                                                                                                                                                                                                                                                                                                 | Number of hits |              |                     |
|-----------------------------------------------------|-----|----------------------------------------------------------------------------------------------------------------------------------------------------------------------------------------------------------------------------------------------------------------------------------------------------------------------------------------------------------------------------------------------------------------------------------------------------------------------------------------------------------------------------------------------------------------------------------------------------------------------------------------------------------------------------------------------------------------------------------------------------------------------------------------------------------------------------------------------------------------------------------------------------------------------------------------------------------------------------------------------------------------------------------------------------------------------------------------------------------------------------------------------------------------------------------------------------------------------------------------------------------------------------------------------------------------------------------------------------------------------------------------------------------------------------------------------------------------------------------------------------------------------------------------------------------------------------------------------|----------------|--------------|---------------------|
|                                                     |     |                                                                                                                                                                                                                                                                                                                                                                                                                                                                                                                                                                                                                                                                                                                                                                                                                                                                                                                                                                                                                                                                                                                                                                                                                                                                                                                                                                                                                                                                                                                                                                                              | Original SLR   | First update | Second update       |
|                                                     |     | ester")) OR<br>EMB.EXACT.EXPLODE("diphencyprone") OR<br>EMB.EXACT.EXPLODE("PUVA") OR<br>EMB.EXACT.EXPLODE("minoxidil") OR<br>EMB.EXACT.EXPLODE("dithranol") OR<br>EMB.EXACT.EXPLODE("cyclosporine") OR<br>EMB.EXACT.EXPLODE("tacrolimus") OR<br>EMB.EXACT.EXPLODE("latanoprost") OR<br>EMB.EXACT.EXPLODE("bimatoprost") OR<br>EMB.EXACT.EXPLODE("etanercept") OR<br>EMB.EXACT.EXPLODE("alefacept") OR<br>EMB.EXACT.EXPLODE("salazosulfapyridine")<br>OR EMB.EXACT.EXPLODE("methotrexate") OR<br>EMB.EXACT.EXPLODE("methisoprinol") OR<br>(EMB.EXACT.EXPLODE("excimer laser")) OR<br>EMB.EXACT.EXPLODE("baricitinib") OR<br>EMB.EXACT.EXPLODE("tofacitinib") OR<br>EMB.EXACT.EXPLODE("ruxolitinib") OR<br>EMB.EXACT.EXPLODE("ritlecitinib") OR<br>EMB.EXACT.EXPLODE("deuruxolitinib") OR<br>EMB.EXACT.EXPLODE("azathioprine") OR<br>EMB.EXACT.EXPLODE("prednisone") OR<br>EMB.EXACT.EXPLODE("betamethasone") OR<br>EMB.EXACT.EXPLODE("glucocorticoid") OR<br>(EMB.EXACT.EXPLODE("tumor necrosis factor inhibitor")) OR<br>EMB.EXACT.EXPLODE("bexarotene") OR<br>EMB.EXACT.EXPLODE("pimecrolimus") OR<br>(EMB.EXACT.EXPLODE("prostaglandin F2 alpha")) OR<br>(EMB.EXACT.EXPLODE("phosphodiesterase IV inhibitor")) OR<br>EMB.EXACT.EXPLODE("mycophenolate mofetil") OR<br>EMB.EXACT.EXPLODE("ustekinumab") OR<br>EMB.EXACT.EXPLODE("interleukin 17 antibody") OR<br>EMB.EXACT.EXPLODE("dapson") OR<br>EMB.EXACT("ezetimibe plus simvastatin") OR<br>EMB.EXACT("simvastatin") OR<br>EMB.EXACT("ezetimibe") OR<br>EMB.EXACT.EXPLODE("salazosulfapyridine")<br>OR EMB.EXACT.EXPLODE("apremilast") |                |              |                     |
|                                                     | S77 | S74 OR S75 OR S76                                                                                                                                                                                                                                                                                                                                                                                                                                                                                                                                                                                                                                                                                                                                                                                                                                                                                                                                                                                                                                                                                                                                                                                                                                                                                                                                                                                                                                                                                                                                                                            | 10578374       | 10911782     | 251037 <sup>‡</sup> |
| Population+ RCT+ Observational study+ Interventions | S78 | S73 AND S77                                                                                                                                                                                                                                                                                                                                                                                                                                                                                                                                                                                                                                                                                                                                                                                                                                                                                                                                                                                                                                                                                                                                                                                                                                                                                                                                                                                                                                                                                                                                                                                  | 2386           | 2490         | 115 <sup>†</sup>    |
| Study/ publication type filter                      | S79 | TI,AB(case NEAR/1 (stud* OR report))                                                                                                                                                                                                                                                                                                                                                                                                                                                                                                                                                                                                                                                                                                                                                                                                                                                                                                                                                                                                                                                                                                                                                                                                                                                                                                                                                                                                                                                                                                                                                         | 1871483        | 1952710      | 57040 <sup>‡</sup>  |
|                                                     | S80 | EMB.EXACT("Case study")                                                                                                                                                                                                                                                                                                                                                                                                                                                                                                                                                                                                                                                                                                                                                                                                                                                                                                                                                                                                                                                                                                                                                                                                                                                                                                                                                                                                                                                                                                                                                                      | 135971         | 139569       | 3438 <sup>†</sup>   |
|                                                     | S81 | (EMB.EXACT("Abstract report" OR "Letter"))                                                                                                                                                                                                                                                                                                                                                                                                                                                                                                                                                                                                                                                                                                                                                                                                                                                                                                                                                                                                                                                                                                                                                                                                                                                                                                                                                                                                                                                                                                                                                   | 1203694        | 1228607      | 18585 <sup>‡</sup>  |
|                                                     | S82 | (RTYPE("Case reports"))                                                                                                                                                                                                                                                                                                                                                                                                                                                                                                                                                                                                                                                                                                                                                                                                                                                                                                                                                                                                                                                                                                                                                                                                                                                                                                                                                                                                                                                                                                                                                                      | 2191036        | 2244597      | 30031 <sup>‡</sup>  |
|                                                     | S83 | RTYPE("Letter")                                                                                                                                                                                                                                                                                                                                                                                                                                                                                                                                                                                                                                                                                                                                                                                                                                                                                                                                                                                                                                                                                                                                                                                                                                                                                                                                                                                                                                                                                                                                                                              | 2323083        | 2380574      | 41247 <sup>‡</sup>  |
|                                                     | S84 | (RTYPE("Historical article"))                                                                                                                                                                                                                                                                                                                                                                                                                                                                                                                                                                                                                                                                                                                                                                                                                                                                                                                                                                                                                                                                                                                                                                                                                                                                                                                                                                                                                                                                                                                                                                | 364297         | 367500       | 516 <sup>†</sup>    |
|                                                     | S85 | (PSTYPE("Conference proceedings") AND PD(1900-2018))                                                                                                                                                                                                                                                                                                                                                                                                                                                                                                                                                                                                                                                                                                                                                                                                                                                                                                                                                                                                                                                                                                                                                                                                                                                                                                                                                                                                                                                                                                                                         | 4328           | 4328         | 0 <sup>†</sup>      |
|                                                     | S86 | (RTYPE("Conference abstract") AND PD(1900-2018))                                                                                                                                                                                                                                                                                                                                                                                                                                                                                                                                                                                                                                                                                                                                                                                                                                                                                                                                                                                                                                                                                                                                                                                                                                                                                                                                                                                                                                                                                                                                             | 3394136        | 3398044      | 0 <sup>†</sup>      |
|                                                     | S87 | RTYPE("Editorial")                                                                                                                                                                                                                                                                                                                                                                                                                                                                                                                                                                                                                                                                                                                                                                                                                                                                                                                                                                                                                                                                                                                                                                                                                                                                                                                                                                                                                                                                                                                                                                           | 1269215        | 1312862      | 31404 <sup>‡</sup>  |
|                                                     | S88 | RTYPE("Note")                                                                                                                                                                                                                                                                                                                                                                                                                                                                                                                                                                                                                                                                                                                                                                                                                                                                                                                                                                                                                                                                                                                                                                                                                                                                                                                                                                                                                                                                                                                                                                                | 856590         | 883251       | 15665 <sup>‡</sup>  |

| Topic                                                                        | Set | Searched for                                                       | Number of hits |              |               |
|------------------------------------------------------------------------------|-----|--------------------------------------------------------------------|----------------|--------------|---------------|
|                                                                              |     |                                                                    | Original SLR   | First update | Second update |
|                                                                              | S89 | S79 OR S80 OR S81 OR S82 OR S83 OR S84 OR S85 OR S86 OR S87 OR S88 | 11565897       | 11810509     | 161601‡       |
| (Population+ RCT+ Observational study+ Interventions) minus filtered studies | S90 | (S78 NOT S89)                                                      | 1395†          | 1859         | 84†           |
| Study/ publication filter excluding letters                                  | S91 | S88 OR S87 OR S86 OR S85 OR S84 OR S82 OR S80 OR S79               | NA             | 9581330      | 122004‡       |
|                                                                              | S92 | (S78 NOT S91)                                                      | NA             | 2037         | 111†.^        |
| Letters from inception                                                       | S93 | (S92 NOT S90)                                                      | NA             | 158†         | 14†           |
| Update from July 1, 2021                                                     | S94 | (S90) and (pd(>20210701))                                          | NA             | 92†          | 84†           |
|                                                                              | S95 | S94 OR S93                                                         | NA             | 250†         | 111†.^        |

† Duplicates are removed from the search and from the result count.

‡ Duplicates are removed from the search but included in the result count.

§ List of interventions are based on the consensus studies and guidelines [1-4].

NA, not applicable; SLR, systematic literature review.

## B. Cochrane (CENTRAL and CDSR)

| Topic                     | Set | Terms                                                                                                                                                                                                                                                                                                                                                                                                                                                                                                                                                                                                                                                                                                                                                                                                                                                                                                                                                                                                                                                                                                                                                                                                                                                                                                                                                                                                                                                                                                     | Number of hits |              |               |
|---------------------------|-----|-----------------------------------------------------------------------------------------------------------------------------------------------------------------------------------------------------------------------------------------------------------------------------------------------------------------------------------------------------------------------------------------------------------------------------------------------------------------------------------------------------------------------------------------------------------------------------------------------------------------------------------------------------------------------------------------------------------------------------------------------------------------------------------------------------------------------------------------------------------------------------------------------------------------------------------------------------------------------------------------------------------------------------------------------------------------------------------------------------------------------------------------------------------------------------------------------------------------------------------------------------------------------------------------------------------------------------------------------------------------------------------------------------------------------------------------------------------------------------------------------------------|----------------|--------------|---------------|
|                           |     |                                                                                                                                                                                                                                                                                                                                                                                                                                                                                                                                                                                                                                                                                                                                                                                                                                                                                                                                                                                                                                                                                                                                                                                                                                                                                                                                                                                                                                                                                                           | Original SLR   | First update | Second update |
| Population                | 1   | MeSH descriptor: [Alopecia Areata] this term only                                                                                                                                                                                                                                                                                                                                                                                                                                                                                                                                                                                                                                                                                                                                                                                                                                                                                                                                                                                                                                                                                                                                                                                                                                                                                                                                                                                                                                                         | 286            | 309          | 354           |
|                           | 2   | ("alopecia areata" OR "alopecia universalis" OR "alopecia totalis" OR "alopecia circumscripta" OR "alopecia ophiasis"):ti,ab,kw                                                                                                                                                                                                                                                                                                                                                                                                                                                                                                                                                                                                                                                                                                                                                                                                                                                                                                                                                                                                                                                                                                                                                                                                                                                                                                                                                                           | 554            | 589          | 687           |
|                           | 3   | #1 OR #2                                                                                                                                                                                                                                                                                                                                                                                                                                                                                                                                                                                                                                                                                                                                                                                                                                                                                                                                                                                                                                                                                                                                                                                                                                                                                                                                                                                                                                                                                                  | 554            | 589          | 687           |
| Intervention <sup>†</sup> | 4   | ("corticosteroid" OR "desoximetasone" OR "clobetasol" OR "triamcinolone" OR "hydrocortisone" OR "intralesional steroid*" OR "systemic corticosteroid*" OR "prednisolone" OR "methylprednisolone" OR "dexamethasone" OR "Contact immunotherapy" OR "1-chloro,2,4,dinitrobenzene" OR "DNCB" OR "squaric acid dibutyl ester" OR "SADBE" OR "2,3-diphenylcyclopropanone" OR "DPCP" OR "photochemotherapy" OR "psoralen" OR "ultraviolet" OR "PUVA" OR "minoxidil" OR "dithranol" OR "anthralin" OR "Calcineurin inhibitor*" OR "ciclosporin" OR "tacrolimus" OR "latanoprost" OR "bimatoprost" OR "etanercept" OR "alefacept" OR "sulfasalazine" OR "methotrexate" OR "Isoprinosine" OR "laser" OR "aromatherapy" OR "hypnotherapy" OR "baricitinib" OR "tofacitinib" OR "ruxolitinib" OR "PF-06651600" OR "ritlectinib" OR "CTP-543" OR "methotrexate" OR "cyclosporine" OR "azathioprin" OR "topical immunotherapy" OR "prednisone" OR "betamethasone" OR "glucocorticoid*" OR "topical corticosteroid*" OR "monoclonal antibody" OR "TNF inhibitor*" OR "anti-TNF" OR "biologic*" OR "Janus kinase inhibitor*" OR "JAK inhibitor*" OR "bexarotene" OR "pimecrolimus" OR "prostaglandin F2alpha" OR "diphencyprone" OR "308-nm" OR "excimer" OR "PDE4 inhibitor" OR "phosphodiesterase 4 inhibitor" OR "phosphodiesterase IV inhibitor" OR "mycophenolate mofetil" OR "ustekinumab" OR "Interleukin 17 inhibitor" OR "dapsons" OR "simvastatin" OR "ezetimibe" OR "sulfasalazine" OR "apremilast"):ti,ab,kw | 236451         | 247398       | 504909        |
|                           | 5   | #3 AND #4 in Cochrane Reviews, Trials                                                                                                                                                                                                                                                                                                                                                                                                                                                                                                                                                                                                                                                                                                                                                                                                                                                                                                                                                                                                                                                                                                                                                                                                                                                                                                                                                                                                                                                                     | 347            | 371          | 473           |
|                           | 6   | #5 with Cochrane Library publication date Between Jul 2021 and Feb 2022                                                                                                                                                                                                                                                                                                                                                                                                                                                                                                                                                                                                                                                                                                                                                                                                                                                                                                                                                                                                                                                                                                                                                                                                                                                                                                                                                                                                                                   | NA             | 23           | NA            |
|                           | 7   | #5 with Cochrane Library publication date Between Feb 2022 and Jul 2022                                                                                                                                                                                                                                                                                                                                                                                                                                                                                                                                                                                                                                                                                                                                                                                                                                                                                                                                                                                                                                                                                                                                                                                                                                                                                                                                                                                                                                   | NA             | NA           | 27            |

<sup>†</sup> List of interventions are based on the consensus studies and guidelines [1-4]. The search term for azathioprine included an error that was used in the first three search iterations and removed for the fourth iteration of the search. This error generated additional results over those expected and did not cause any relevant items to be missed but may have caused adjudication of more items than necessary.

CDSR, Cochrane Database of Systematic Reviews; NA, not applicable; SLR, systematic literature review.



### C. Clinicaltrials.gov portal

| Topic           | Set | Terms                                                                                                                | Number of hits |
|-----------------|-----|----------------------------------------------------------------------------------------------------------------------|----------------|
| Population      | 1   | "alopecia areata" OR "alopecia universalis" OR "alopecia totalis" OR "alopecia circumscripta" OR "alopecia ophiasis" | 372            |
| Applying Filter | 2   | Recruiting OR Not yet recruiting OR Active, not recruiting OR Enrolling by invitation Studies                        | 90             |

### D. World Health Organization International Clinical Trials Register

| Topic      | Set | Terms                                                                                                                | Number of hits |
|------------|-----|----------------------------------------------------------------------------------------------------------------------|----------------|
| Population | 1   | "alopecia areata" OR "alopecia universalis" OR "alopecia totalis" OR "alopecia circumscripta" OR "alopecia ophiasis" | 170            |

### E. European Union Clinical Trials Register

| Topic      | Set | Terms                                                                                                                | Number of hits |
|------------|-----|----------------------------------------------------------------------------------------------------------------------|----------------|
| Population | 1   | "alopecia areata" OR "alopecia universalis" OR "alopecia totalis" OR "alopecia circumscripta" OR "alopecia ophiasis" | 9 <sup>†</sup> |

<sup>†</sup> Trials with EudraCT protocol

### F. Hand-search of conference abstracts

| Conference Name                                                         | Year ( <a href="#">link</a> ) | Search term       | Results            |
|-------------------------------------------------------------------------|-------------------------------|-------------------|--------------------|
| American Academy of Dermatology                                         | <a href="#">2021</a>          | "alopecia areata" | 0 included from 18 |
|                                                                         | <a href="#">2022</a>          |                   | 5 included from 29 |
| Annual Alopecia Areata Conference (National Alopecia Areata Foundation) | 2019                          |                   | Not available      |
|                                                                         | 2020                          |                   | Not available      |
|                                                                         | 2021                          |                   | Not available      |
|                                                                         | 2022                          |                   | Not available      |
| British Association of Dermatologists                                   | <a href="#">2021</a>          |                   | 0 included from 5  |
|                                                                         | <a href="#">2022</a>          |                   | 0 included from 19 |
| European Academy of Dermatology and Venereology Congress                | 2019                          |                   | Not available      |
|                                                                         | <a href="#">2020</a>          |                   | 0 included from 19 |
|                                                                         | 2021                          |                   | Not available      |
| European Society for Dermatological Research                            | <a href="#">2019</a>          |                   | 0 included from 6  |
|                                                                         | <a href="#">2020</a>          |                   | Not available      |
|                                                                         | <a href="#">2021</a>          |                   | 0 included from 3  |
| Society of Investigative Dermatology                                    | 2021                          |                   | 0 included from 20 |
|                                                                         | <a href="#">2022</a>          |                   | 0 included from 15 |

### G. Hand-search of HTA and other websites

| HTA and other websites                                   | Search term       | Results           |
|----------------------------------------------------------|-------------------|-------------------|
| Scottish Medicines Consortium (SMC)                      | "alopecia areata" | 0                 |
| National Institute for Health and Care Excellence (NICE) |                   | 0 included from 5 |

| <b>HTA and other websites</b>                                                     | <b>Search term</b> | <b>Results</b>                   |
|-----------------------------------------------------------------------------------|--------------------|----------------------------------|
| Haute Autorité de santé (HAS)                                                     |                    | 0                                |
| Canadian Agency for Drugs and Technologies in Health (CADTH)                      |                    | 0                                |
| Pharmaceutical Benefits Advisory Committee (PBAC)                                 |                    | 0 included from 21               |
| Institute for Clinical and Economic Review (ICER)                                 |                    | 0                                |
| United States (US) Food and Drug Administration (FDA) Register <sup>†</sup>       |                    | 0 included from 108 <sup>‡</sup> |
| International Pharmaceutical abstracts (published by Web of Science) <sup>†</sup> |                    | 187 <sup>§</sup>                 |

<sup>†</sup> Not included in the PRISMA because not able to download for screening.

<sup>‡</sup> Not relevant to alopecia areata (AA) or AA treatment.

<sup>§</sup> Payment required for access.

HTA, health technology assessment or agency; PRISMA, Preferred Reporting Items for Systematic Reviews and Meta-Analyses.

**Table S2. Summary of category 3 studies (included in the SLR but not extracted)**

| Study                   | Title                                                                                                                                             | Study design               | Sample size                            | Population                                                                  | Summary                                                                                                                                                                                                                                  |
|-------------------------|---------------------------------------------------------------------------------------------------------------------------------------------------|----------------------------|----------------------------------------|-----------------------------------------------------------------------------|------------------------------------------------------------------------------------------------------------------------------------------------------------------------------------------------------------------------------------------|
| Abdallah et al. [5]     | Efficacy of intradermal minoxidil 5% injections for treatment of patchy non-severe alopecia areata                                                | RCT, intra-patient         | 20                                     | Adults with AA and <50% scalp hair loss                                     | Baseline SALT ranged from 7.5–48.4%; minoxidil had an effect comparable to control (micro-needling) and no additive effect when combined with intralesional triamcinolone                                                                |
| Açıkgöz et al. [6]      | Targeted photochemotherapy in alopecia areata                                                                                                     | Retrospective chart review | 7                                      | Adults, localized AA (patchy)                                               | All patients had a cosmetically acceptable regrowth (not further defined)                                                                                                                                                                |
| Alkeraye et al. [7]     | Efficacy of combining pulse corticotherapy and methotrexate in alopecia areata: Real-life evaluation                                              | Prospective, uncontrolled  | 20                                     | Adults, recent onset AA; most patients with extent of hair loss not defined | 25% patchy, 45% ophiasis, 10% AT, 20% AU. At the 6-month post-PCT follow-up visit, 9 of 14 patients in the combined treatment group and 2 of the 6 patients in the PCT group had achieved >50% scalp hair regrowth. No AEs were reported |
| Balakrishnan et al. [8] | A comparative study of therapeutic response to intralesional injections of platelet-rich plasma versus triamcinolone acetonide in alopecia areata | RCT                        | Triamcinolone 20<br>PRP 20             | Adults<br>Patchy AA of the scalp (≤5 patches)                               | SALT <7 and <4 at baseline for PRP and triamcinolone, respectively. No significant difference was observed between the groups at week 12                                                                                                 |
| Bayramgürler 2011 [9]   | Narrowband ultraviolet B phototherapy for alopecia areata                                                                                         | Retrospective chart review | 25                                     | AA and >50% scalp hair loss                                                 | Eight patients received concomitant systemic corticosteroid injections. Four of the 6 patients who achieved excellent response had received corticosteroids                                                                              |
| Byun et al. [10]        | Effectiveness of 308-nm Excimer Laser Therapy in Treating Alopecia Areata, Determined by Examining the Treated Sides of Selected Alopecic Patches | Prospective, intra-patient | 10                                     | Adults with AA and <20% scalp hair loss                                     | Only the hair diameter in the treated half of individual patches was significantly increased vs control side                                                                                                                             |
| Devi et al. [11]        | Intralesional triamcinolone acetonide versus topical betamethasone vaearate in the management of localized alopecia areata                        | RCT                        | Triamcinolone 113<br>Betamethasone 113 | Adults with localized AA (<3 patches)                                       | Baseline: 76.1% with single patch in each arm. Hair regrowth (not defined) was observed in 84 and 53 patients in the triamcinolone and betamethasone groups respectively                                                                 |
| El-Husseiny et al. [12] | Comparative study between fractional carbon dioxide laser vs intralesional steroid injection in treatment of alopecia areata                      | Prospective, intra-patient | 20                                     | Adults with patchy AA (≥2 patches)                                          | Baseline SALT not provided. Median improvement of patch treated with laser reported higher than for steroid at month 3                                                                                                                   |

| Study                      | Title                                                                                                                                                                                                 | Study design                                                                                        | Sample size                                                                                                      | Population                                                               | Summary                                                                                                                                                                                                                                                 |
|----------------------------|-------------------------------------------------------------------------------------------------------------------------------------------------------------------------------------------------------|-----------------------------------------------------------------------------------------------------|------------------------------------------------------------------------------------------------------------------|--------------------------------------------------------------------------|---------------------------------------------------------------------------------------------------------------------------------------------------------------------------------------------------------------------------------------------------------|
| El Khoury et al. [13]      | Topical immunomodulation with diphenylcyclopropenone for alopecia areata: the Lebanese experience                                                                                                     | Retrospective chart review                                                                          | 34                                                                                                               | Patients with patchy AA, AT, AU                                          | 20 with patchy AA (no SALT provided), 4 with AT and 10 with AU; 39% scalp hair loss at baseline. 27 patients achieved a partial response to DPCP, of whom 10 relapsed                                                                                   |
| El-Taweel & Akl [14]       | Intralesional pentoxifylline injection in localized alopecia areata                                                                                                                                   | RCT                                                                                                 | Triamcinolone 25<br>Pentoxifylline 25<br>Combination 25                                                          | Adults with AA and <50% scalp hair loss                                  | The highest response was reported in the combination group, followed by pentoxifylline and triamcinolone                                                                                                                                                |
| Fiedler-Weiss [15]         | Topical minoxidil solution (1% and 5%) in the treatment of alopecia areata                                                                                                                            | 2 studies:<br>Minoxidil 1%:<br>single arm<br>Minoxidil 5%:<br>RCT vs. PBO 12 weeks, then single arm | 66 patients (26 participating in both studies)<br>Minoxidil 1% 48 (single arm only)<br>Minoxidil 5% 26<br>PBO 21 | Adults with Mild to severe scalp AA                                      | Minoxidil 1%: baseline hair loss <25% in 24 patients; 75–100% in 24 patients. 11 cosmetic responders after 30 weeks<br>Minoxidil 5%: baseline hair loss 25–74% in 11 and 75–100 in 36 patients. Six cosmetic responders after 60 weeks                  |
| Georgala et al. [16]       | Inosiplex for treatment of alopecia areata: A randomized placebo-controlled study                                                                                                                     | RCT vs. PBO                                                                                         | Inosiplex 16<br>PBO 16                                                                                           | Adults with recalcitrant patchy AA, ophiasis or AT (not defined further) | Baseline SALT not reported; 21 patchy AA, 9 ophiasis, 2 AT; 3 patients discontinued. At week 12, complete hair growth in 5 and 0 patients and partial hair growth in 8 and 4 patients in the inosiplex and PBO arms, respectively (p<0.01 for response) |
| Giorgio et al. [17]        | Combination of photodynamic therapy (PDT) with 5-aminolaevulinic acid and microneedling (MN) in the treatment of alopecia areata resistant to conventional therapies: our experience with 41 patients | RCT                                                                                                 | MN 9<br>PDT 15<br>MN+PDT 17                                                                                      | Adults with moderate to severe AA (not defined further)                  | No data on baseline hair loss. No patients responded to MN; 2 PDT and 3 PDT+MN with 100% hair regrowth                                                                                                                                                  |
| Gupta et al. [18]          | Comparative evaluation of efficacy between topical calcipotriol used along with topical clobetasol and topical clobetasol monotherapy in treatment of alopecia areata: A randomized clinical trial    | RCT                                                                                                 | A) Clobetasol 30<br>B) Clobetasol and Calcipotriol 30                                                            | Adults with patchy AA and <50% scalp hair loss                           | Baseline SALT score was 10.45 and 9.85 in group A and B, respectively (p=0.65). At week 24, SALT score significantly decreased in both groups to 5.98 and 3.66 in group A and B, respectively (p<0.05 between treatments)                               |
| Gupta et al. [19]          | Weekly azathioprine pulse (WAP) versus betamethasone oral mini-pulse in the treatment of moderate-to-severe alopecia areata                                                                           | RCT                                                                                                 | WAP 25<br>Betamethasone 25                                                                                       | Adults with AA and ≥10% scalp hair loss (AU excluded)                    | Baseline SALT (14–58) (WAP) and (14–55) (betamethasone). At month 9, 10 on WAP and 13 on betamethasone achieved complete hair regrowth                                                                                                                  |
| Guttman-Yassky et al. [20] | Phase 2a randomized clinical trial of dupilumab (anti-IL-4Rα) for alopecia areata patients                                                                                                            | RCT vs. PBO                                                                                         | Dupilumab 40<br>PBO 20                                                                                           | Adults with AA and ≥30% scalp hair loss                                  | 50% of patients on dupilumab had a SALT<75 at baseline vs. 40% in the PBO arm. At week 24, the improvement in SALT                                                                                                                                      |

| Study                      | Title                                                                                                                                                                                              | Study design              | Sample size                                         | Population                                     | Summary                                                                                                                                                                                   |
|----------------------------|----------------------------------------------------------------------------------------------------------------------------------------------------------------------------------------------------|---------------------------|-----------------------------------------------------|------------------------------------------------|-------------------------------------------------------------------------------------------------------------------------------------------------------------------------------------------|
|                            |                                                                                                                                                                                                    |                           |                                                     |                                                | from baseline in the dupilumab group was significantly greater vs. PBO (p=0.049).                                                                                                         |
| Hamdino et al. [21]        | Intralesional methotrexate (MTX) versus triamcinolone acetonide (TRA) for localized alopecia areata treatment: A randomized clinical trial                                                         | RCT                       | MTX 20<br>TRA 20                                    | Adults with AA and <50% scalp hair loss        | Patchy AA; range SALT 1.2–8.4 and 1.2–14.3 in the MTX and TRA groups, respectively. At month 3, 12, and 10 patients with a SALT 0 with MTX and TRA, respectively                          |
| Hay et al. [22]            | Randomized trial of aromatherapy. Successful treatment for alopecia areata                                                                                                                         | RCT vs. PBO               | Aromatherapy 43<br>PBO 41                           | AA; hair loss severity not defined             | No data on baseline hair loss. 19 and 6 patients with ≥10% scalp hair regrowth at month 7 with aromatherapy and PBO, respectively (p=0.008)                                               |
| Jalali et al. [23]         | Comparing the efficiency of elidel cream and elidel accompanied with tretinoin cream in treatment of alopecia areata                                                                               | RCT                       | (A) Topical tretinoin and Elidel 40<br>B) Elidel 40 | Adults with patchy AA (≤4 patches)             | Baseline mean number of patches was 2.4 and 2.8 in group A and B, respectively (p=0.88). 31 and 22 patients reported complete or partial response in group A and B, respectively (p=0.03) |
| Kapoor et al. [24]         | Comparative evaluation of therapeutic efficacy of intralesional injection of triamcinolone acetonide (TRA) versus intralesional autologous platelet-rich plasma (PRP) injection in alopecia areata | RCT                       | A) TRA 20<br>B) PRP 20                              | Adults with AA and <25% scalp hair loss        | Baseline mean SALT of 9.01 and 4.42 in group A and B, respectively. At week 24, SALT was 2.27 and 3.07 in group A and B, respectively (p<0.001)                                           |
| Kerkemeyer & Sinclair [25] | Treatment of chronic alopecia areata with tildrakizumab: an open-label pilot study                                                                                                                 | Prospective, uncontrolled | 9                                                   | Patients with moderate to severe AA (SALT >35) | Baseline SALT from 38 to 100. Two patients had a partial response, and 7 patients had no regrowth.                                                                                        |
| Kianfar et al. [26]        | Comparison of the efficacy and safety of 308-nm excimer laser with intralesional corticosteroids for the treatment of alopecia areata: A randomized controlled study                               | RCT, intra-patient        | 16                                                  | Adult with AA and ≥2 patches                   | Baseline: 14 with patchy AA and 2 with ophiasis. Intralesional corticosteroid was associated with a higher score of hair regrowth vs. laser                                               |
| Lai et al. [27]            | Sublingual tofacitinib for alopecia areata: A roll-over pilot clinical trial of efficacy                                                                                                           | Prospective, uncontrolled | 18                                                  | Adults with moderate to severe AA              | At baseline, 5 with patchy AA, 6 with AT, 7 with AU. At week 12, 12.5% of patients on sublingual tofacitinib achieved SALT <sub>50</sub>                                                  |
| Lattouf et al. [28]        | Treatment of alopecia areata with simvastatin/ezetimibe                                                                                                                                            | Prospective, uncontrolled | 29                                                  | Adults with AA and 40–70% scalp hair loss      | Baseline hair loss not reported. 19 completed 24 weeks of treatment with 14 responders (i.e., >20% hair regrowth)                                                                         |

| Study                  | Title                                                                                                                                                                                                                                                     | Study design                          | Sample size                                                                                                   | Population                                    | Summary                                                                                                                                                                                                              |
|------------------------|-----------------------------------------------------------------------------------------------------------------------------------------------------------------------------------------------------------------------------------------------------------|---------------------------------------|---------------------------------------------------------------------------------------------------------------|-----------------------------------------------|----------------------------------------------------------------------------------------------------------------------------------------------------------------------------------------------------------------------|
| Li et al. [29]         | Efficacy and Influence Factors of 308-nm Excimer Lamp with Minoxidil in the Treatment of Alopecia Areata                                                                                                                                                  | Intra-patient controlled              | 38                                                                                                            | Adults with AA and <25% scalp hair loss       | 34 patients completed the study; 44.1% with >50% hair regrowth on the treated side and 23.5% with >50% hair regrowth on the control side                                                                             |
| Lim et al. [30]        | Low-dose systemic methotrexate therapy for recalcitrant alopecia areata                                                                                                                                                                                   | Retrospective chart review            | 29                                                                                                            | Recalcitrant AA (not defined further)         | 23 patients with 25–49% scalp hair loss, 6 with ≥50% hair loss. 26 patients achieved ≥75% hair regrowth                                                                                                              |
| Mancuso et al. [31]    | Efficacy of betamethasone valerate foam (BVF) formulation in comparison with betamethasone dipropionate (BDP) lotion in the treatment of mild-to-moderate alopecia areata: a multicenter, prospective, randomized, controlled, investigator-blinded trial | RCT                                   | BVF 31<br>BDP 30                                                                                              | Adults with AA and <26% scalp hair loss       | Mean scalp hair loss at baseline <10%. At week 20, 19 patients in the BVF group and 8 in the BDP group had >75% hair regrowth                                                                                        |
| Metwally et al. [32]   | Comparative study for treatment of alopecia areata using carboxy therapy, intralesional corticosteroids, and a combination of both                                                                                                                        | RCT, intra-patient                    | 30, each patient receiving<br>A) intralesional steroids<br>B) intralesional carboxy therapy<br>C) combination | Adults with AA and ≤50% scalp hair loss       | Baseline mean SALT 10.91, 10.96, and 11.33 in group A, B, and C, respectively. At week 12, mean SALT was 8.11, 7.55, and 6.96 in group A, B, and C, respectively                                                     |
| Mikhaylov et al. [33]  | A randomized placebo-controlled single-center pilot study of the safety and efficacy of apremilast in subjects with moderate-to-severe alopecia areata                                                                                                    | RCT vs. PBO                           | Apremilast 20<br>PBO 10                                                                                       | Adults with AA and >50% scalp hair loss       | Baseline mean SALT 88 and 87.7 in the apremilast and PBO group, respectively. One patient in each group reached SALT <sub>50</sub> at week 24                                                                        |
| Molinelli et al. [34]  | Efficacy and safety of topical calcipotriol 0.005% versus topical clobetasol 0.05% in the management of alopecia areata: An intrasubject pilot study                                                                                                      | Prospective, intra-patient controlled | 35, each patient receiving<br>topical calcipotriol /<br>topical clobetasol                                    | Adults with patchy, mild-to-moderate scalp AA | Baseline: 24 with 11–50% hair loss, 11 with 51–75% hair loss. No difference in terms of regrowth between the 2 interventions: >75% hair regrowth in 22 and 16 patients at calcipotriol- and clobetasol-treated sites |
| Napolitano et al. [35] | Clinical, trichoscopic and in vivo reflectance confocal microscopy evaluation of alopecia areata in atopic dermatitis patients treated with dupilumab                                                                                                     | Retrospective chart review            | Dupilumab 10                                                                                                  | Adults with atopic dermatitis and AA          | At baseline, 2 with multifocal AA, 5 with AT and 3 with AU; mean baseline SALT was 91.6 (±12.4). No significant trend in SALT after 52 weeks of treatment                                                            |
| Narahari [36]          | Comparative efficacy of topical anthralin and intralesional triamcinolone                                                                                                                                                                                 | RCT                                   | Anthralin 50<br>TRA 50                                                                                        | Adults with AA and a single                   | Baseline severity not shown; only 69 patients analyzed. Complete regrowth was observed in 18/37 on TRA and 20/32 on anthralin                                                                                        |

| Study                  | Title                                                                                                                                                             | Study design                                               | Sample size                                                    | Population                                                                | Summary                                                                                                                                                                                                                    |
|------------------------|-------------------------------------------------------------------------------------------------------------------------------------------------------------------|------------------------------------------------------------|----------------------------------------------------------------|---------------------------------------------------------------------------|----------------------------------------------------------------------------------------------------------------------------------------------------------------------------------------------------------------------------|
|                        | (TRA) in the treatment of alopecia areata                                                                                                                         |                                                            |                                                                | lesion on the scalp                                                       |                                                                                                                                                                                                                            |
| Ochoa et al. [37]      | Instilled bimatoprost ophthalmic solution in patients with eyelash alopecia areata                                                                                | Prospective, intra-patient controlled                      | 11                                                             | Adults with AA and ≥50% bilateral eyelash loss                            | Bimatoprost ophthalmic solution was not effective in promoting eyelash growth in the 5 patients with 95–100% eyelash loss at baseline                                                                                      |
| Ohtsuki et al. [38]    | 308-nm excimer lamp for the treatment of alopecia areata: Clinical trial on 16 cases                                                                              | Prospective, uncontrolled                                  | 16                                                             | Adults with AA; single or multiple lesions (not defined further)          | Seven patients had a single AA patch and 9 multiple AA lesions. 10 (4 and 6, respectively) patients had >50% regrowth.                                                                                                     |
| Olsen et al. [39]      | Ruxolitinib cream for the treatment of patients with alopecia areata: A 2-part, double-blind, randomized, vehicle-controlled phase 2 study                        | Part A – Prospective, uncontrolled<br>Part B – RCT vs. PBO | Part A 12<br>Part B Ruxo 39<br>PBO 39                          | Adults<br>Part A: SALT 25–99<br>Part B: SALT 25–99 and up to 10% AT or AU | Part A: mean SALT 56.2; 83.3% patchy AA. Six patients with SALT <sub>50</sub> at week 24<br>Part B: mean SALT 59 and 59.9 in PBO and Ruxo arms, respectively. Five patients with SALT <sub>50</sub> at week 24 in each arm |
| Park et al. [40]       | Topical tacrolimus (FK506): Treatment failure in four cases of alopecia universalis                                                                               | Prospective, uncontrolled                                  | 4                                                              | AU                                                                        | Four patients with AU. No evidence of hair regrowth after 3 months                                                                                                                                                         |
| Price et al. [41]      | Subcutaneous efalizumab is not effective in the treatment of alopecia areata                                                                                      | RCT vs. PBO                                                | Efalizumab 37<br>PBO 25                                        | Adults with AA (moderate-severe)<br>AU excluded                           | No statistical differences between treatment groups in % hair regrowth after 12 or 24 weeks                                                                                                                                |
| Rafati et al. [42]     | The effect of latanoprost 0.005% solution in the management of scalp alopecia areata, a randomized double-blind placebo-controlled trial                          | RCT vs. PBO                                                | Latanoprost 12<br>PBO 12<br>(all patients on clobetasol 0.05%) | Adults with patchy AA                                                     | Baseline SALT was 1.3 for latanoprost group and 1.7 for control group. Reduction in SALT was inconsistent between the groups                                                                                               |
| Ricar et al. [43]      | Topical bimatoprost in the treatment of eyelash loss in alopecia totalis and universalis: A prospective, open-label study                                         | Prospective, uncontrolled                                  | 17 at start<br>16 completers                                   | Adults with ≥90% bilateral eyelash loss                                   | No new eyelash growth at a mean follow-up of 30.6 weeks                                                                                                                                                                    |
| Rigopoulos et al. [44] | Lack of response of alopecia areata to pimecrolimus cream                                                                                                         | Intra-patient controlled                                   | 15                                                             | AA affecting 10–25% of the scalp                                          | No significant response to pimecrolimus cream 1% for any patient                                                                                                                                                           |
| Sanga [45]             | Comparative study of efficacy of excimer light therapy vs. intralesional triamcinolone (TRA) vs. topical 5% minoxidil for alopecia areata: An observational study | Prospective                                                | Excimer light 40<br>TRA 46<br>Minoxidil 14                     | AA, 1–6 patches (AT/AU excluded)                                          | Baseline 76/100 with a single patch. At 6 months, the percentage of patients with >50% hair regrowth was 55%, 71.7%, and 28.6% with excimer light, TRA, and minoxidil, respectively                                        |

| Study                      | Title                                                                                                                                     | Study design               | Sample size                                                        | Population                                | Summary                                                                                                                                                               |
|----------------------------|-------------------------------------------------------------------------------------------------------------------------------------------|----------------------------|--------------------------------------------------------------------|-------------------------------------------|-----------------------------------------------------------------------------------------------------------------------------------------------------------------------|
| Singla et al. [46]         | Comparative efficacy of topical DNCB and puvasol therapy in alopecia areata                                                               | Prospective                | DNCB 25<br>PUVASOL 25                                              | AA<br>No information on severity          | No information on baseline severity of hair loss. At 4 months, 13 and 15 patients had >50% hair regrowth in the DNCB and PUVASOL arms, respectively                   |
| Sirichotiyakul et al. [47] | UV308 excimer lamp phototherapy for the treatment of alopecia areata: A randomized, self-controlled study                                 | RCT, intra-patient         | 4                                                                  | Adults with single-patch AA               | Greater hair regrowth was observed on the irradiated half of the patch vs. the untreated half after 12 weeks of treatment                                             |
| Strober et al. [48]        | Alefacept for severe alopecia areata: a randomized, double-blind, placebo-controlled study                                                | RCT vs. PBO                | Alefacept 23<br>PBO 22                                             | Adults with AA and 50–95% scalp hair loss | Baseline mean SALT 71.1 and 67 in alefacept and PBO arms, respectively. At week 24, 1, and 3 patients with SALT <sub>50</sub> in alefacept and PBO arms, respectively |
| Suchonwanit et al. [49]    | A comparison of the efficacy and tolerability of three corticosteroid treatment regimens in patients with alopecia areata                 | Retrospective Chart Review | Topical steroids 38<br>Intralesional steroids 24<br>Combination 86 | Patchy AA                                 | Baseline: 146/148 with SALT<25. No difference in significant hair regrowth (≥80%) between the 3 groups                                                                |
| Tanakol et al. [50]        | Treatment of alopecia areata with 2940-nm fractional erbium: yttrium-aluminium-garnet laser                                               | Prospective, uncontrolled  | 25                                                                 | Adults with AA                            | AA (18), and AU (7); no SALT at baseline. 62.5% patchy AA with SALT <sub>50</sub> ; no AU with SALT <sub>50</sub>                                                     |
| Taylor & Hawk [51]         | PUVA treatment of alopecia areata partialis, totalis and universalis: Audit of 10'years' experience at S' John's Institute of Dermatology | Retrospective chart review | 70                                                                 | Adults with AA (patchy, AT, AU)           | 24 AA, 11 AT and 35 AU; 16 patients excluded (<24 treatments). Reported rate of success (≥90% hair regrowth) was 6.3% for AA, 12.5% for AT and 13.3% for AU           |
| Toma et al. [52]           | Comparative study between topical methotrexate 1% gel and minoxidil 5% gel in the treatment of localized alopecia areata                  | RCT                        | MTX 25<br>Minoxidil 25                                             | Adults with localized AA                  | Baseline severity not reported. Comparison was not significant after 12 weeks of treatment                                                                            |
| Tosti et al. [53]          | Clobetasol propionate 0.05% under occlusion in the treatment of alopecia totalis/universalis                                              | Prospective, uncontrolled  | 28                                                                 | Adults with AT or AT/AU                   | Eight with >75% scalp hair regrowth at 6 months; 3 of 8 relapsed on treatment                                                                                         |
| Tosti et al. [54]          | Efficacy and safety of a new clobetasol propionate 0.05% foam in alopecia areata: A randomized, double-blind placebo-controlled trial     | RCT vs. PBO Intra-patient  | 34                                                                 | Adults moderate to severe AA              | At baseline, 65% with >50% scalp hair loss. At week 24, 9% of patients had a hair regrowth ≥75%                                                                       |
| Ustuner et al. [55]        | Best dilution of the best corticosteroid for intralesional injection in the treatment of localized alopecia areata in adults              | RCT                        | 83 patients / 231 patches<br>Betamethasone dipropionate (3 groups) | Adults with AA and <50% scalp hair loss   | Baseline SALT not provided. Results at month 6 were similar between the active groups                                                                                 |



| Study                  | Title                                                                                                                     | Study design                      | Sample size                              | Population                                                    | Summary                                                                                                                                |
|------------------------|---------------------------------------------------------------------------------------------------------------------------|-----------------------------------|------------------------------------------|---------------------------------------------------------------|----------------------------------------------------------------------------------------------------------------------------------------|
|                        |                                                                                                                           |                                   | Triamcinolone (3 groups)<br>Saline group |                                                               |                                                                                                                                        |
| Vestey & Savin [56]    | A trial of 1% minoxidil used topically for severe alopecia areata                                                         | RCT vs. PBO                       | Minoxidil 25<br>PBO 25                   | AA                                                            | Patchy (>2/3 of scalp hair loss) (N=11); ophiasis (N=6); AT/AU (N=33). No significant difference in response between PBO and minoxidil |
| Weber et al. [57]      | Apremilast for extensive and treatment-resistant alopecia areata: a retrospective analysis of five patients               | Retrospective chart review        | 5                                        | Adults with AA                                                | Baseline: 2 subtotal AA, 1 AU, 2 ophiasis. One subject responded then relapsed.                                                        |
| White & Friedmann [58] | Topical minoxidil lacks efficacy in alopecia areata.                                                                      | RCT vs. PBO<br>Crossover          | 15                                       | Adults with AT                                                | Grade 3 response (minimal growth of terminal hair) in 3/8 patients on minoxidil 3% at week 16 vs. none in the PBO group                |
| Whitmont & Cooper [59] | PUVA treatment of alopecia areata totalis and universalis: a retrospective study                                          | Retrospective Chart Review        | 36                                       | Adults with AA, and AT (total or near total hair loss) and AU | 26 with follow up. 8/15 with AT and 6/11 with AU achieved a >90% hair regrowth; 1/8 and 2/6 complete responders relapsed               |
| Willemsen et al. [60]  | Hypnosis in refractory alopecia areata significantly improves depression, anxiety, and life quality but not hair regrowth | Observational study (Prospective) | Hypnosis 20<br>Control 21                | Adults with AA and >30% scalp hair loss                       | Majority of patients with >75% hair loss at baseline. At 6 months, 8 patients with <50% hair regrowth (group not mentioned)            |
| Zaher et al. [61]      | Bimatoprost versus mometasone furoate in the treatment of scalp alopecia areata: A pilot study                            | RCT, intra-patient                | 30                                       | Adults with AA and ≤25% scalp hair loss                       | Baseline SALT ranged from 0.9 to 16.8%. 17/30 patches responded to TCS and 25/30 patches responded to topical bimatoprost              |

Category 3 included records with data from adults with mostly mild-to-moderate forms of AA, or severity of hair loss at baseline not documented; records of studies assessing interventions that did not fall into category 1 or 2 (i.e., not recommended, or recommended in mild forms of AA, or as adjunctive therapy only).

AA, alopecia areata; AE, adverse event; AT, alopecia totalis; AU, alopecia universalis; BD, betamethasone; BDP, betamethasone dipropionate lotion; BVF, betamethasone valerate foam; cm, centimeter; DPCP, diphenylcyclopropanone; DNCB, dinitrobenzene; ILK, intralesional kenalog; MN, microneedling; MTX, methotrexate; NAHRS, North American Hair Research Society; NB, narrow band; PBO, placebo; PCT, pulse corticotherapy; PDT, photodynamic therapy; PRP, platelet-rich plasma; PUVA, psoralen plus artificial phototherapy; PUVASOL, psoralen plus solar irradiation; PTX, pentoxifylline; QD, once a day; RCT, randomized controlled trial; Ruxo, ruxocitinib; SALT, severity of alopecia tool; TA, triamcinolone acetonide.

**Table S3. Critical appraisal of included fully published non-randomized trials**

| Study                       | What is the study design of this study? | Was the study a prospective study or a retrospective study? | In case of a case-control study, were the groups similar at the outset of the study in terms of prognostic factors? | Was the intervention used appropriately? | Were the outcomes measured in the study reliable? | Were the outcomes measures in the study valid? | Was the statistical analysis conducted appropriately in the study? | Was the quality of reporting appropriate in the study? | Can the study results be generalized to routine practice? |
|-----------------------------|-----------------------------------------|-------------------------------------------------------------|---------------------------------------------------------------------------------------------------------------------|------------------------------------------|---------------------------------------------------|------------------------------------------------|--------------------------------------------------------------------|--------------------------------------------------------|-----------------------------------------------------------|
| AlMarzoug et al. [62]       | Cohort Study                            | Prospective                                                 | NA                                                                                                                  | Yes                                      | Yes                                               | Yes                                            | Yes                                                                | No                                                     | Yes                                                       |
| Alsufyani et al. [63]       | Cohort study                            | Retrospective                                               | NA                                                                                                                  | Yes                                      | Unclear                                           | Yes                                            | Unclear                                                            | No                                                     | Unclear                                                   |
| Avgerinou et al. [64]       | Cohort study                            | Prospective                                                 | NA                                                                                                                  | Yes                                      | Yes                                               | Yes                                            | Unclear                                                            | Unclear                                                | No                                                        |
| Case et al. [65]            | Cohort study                            | Prospective                                                 | NA                                                                                                                  | Unclear                                  | Unclear                                           | Yes                                            | Unclear                                                            | No                                                     | No                                                        |
| Chen et al. [66]            | Case series                             | Prospective                                                 | NA                                                                                                                  | Unclear                                  | Yes                                               | Yes                                            | Yes                                                                | Yes                                                    | Unclear                                                   |
| Cheng et al. [67]           | Case series                             | Retrospective                                               | NA                                                                                                                  | Yes                                      | Unclear                                           | Yes                                            | Unclear                                                            | Yes                                                    | Unclear                                                   |
| Cotellessa et al. [68]      | Cohort study                            | Prospective                                                 | NA                                                                                                                  | Yes                                      | Yes                                               | Yes                                            | Unclear                                                            | No                                                     | Unclear                                                   |
| Dehghan et al. [69]         | Cohort study                            | Prospective                                                 | NA                                                                                                                  | Yes                                      | Unclear                                           | Unclear                                        | Yes                                                                | No                                                     | Unclear                                                   |
| Dincer Rota et al. [70]     | Case series                             | Retrospective                                               | NA                                                                                                                  | Yes                                      | Unclear                                           | Yes                                            | Unclear                                                            | Yes                                                    | Unclear                                                   |
| English & Heinisch [71]     | Cohort study                            | Retrospective                                               | NA                                                                                                                  | Yes                                      | Unclear                                           | Yes                                            | Unclear                                                            | No                                                     | Unclear                                                   |
| Ferrando & Grimalt [72]     | Case series                             | Prospective                                                 | NA                                                                                                                  | Yes                                      | Unclear                                           | Unclear                                        | Unclear                                                            | Unclear                                                | Unclear                                                   |
| Firooz & Fouladi [73]       | Case series                             | Prospective                                                 | NA                                                                                                                  | Yes                                      | Unclear                                           | Yes                                            | Unclear                                                            | No                                                     | Unclear                                                   |
| Gupta et al. [74]           | Case series                             | Prospective                                                 | NA                                                                                                                  | Yes                                      | Unclear                                           | Unclear                                        | Yes                                                                | Yes                                                    | Unclear                                                   |
| Hogan et al. [75]           | Case series                             | Retrospective                                               | NA                                                                                                                  | Yes                                      | Yes                                               | Yes                                            | Unclear                                                            | No                                                     | Unclear                                                   |
| Hull & Morris [76]          | Case series                             | Prospective                                                 | NA                                                                                                                  | Yes                                      | Unclear                                           | Yes                                            | Unclear                                                            | No                                                     | Unclear                                                   |
| Ibrahim et al. [77]         | Case series                             | Retrospective                                               | NA                                                                                                                  | Yes                                      | Yes                                               | Yes                                            | Unclear                                                            | Yes                                                    | Unclear                                                   |
| Jabbari et al. [78]         | Cohort study                            | Prospective                                                 | NA                                                                                                                  | Yes                                      | Yes                                               | Yes                                            | Unclear                                                            | No                                                     | Unclear                                                   |
| Jang et al. [79]            | Cohort study                            | Retrospective                                               | NA                                                                                                                  | Yes                                      | Unclear                                           | Yes                                            | Unclear                                                            | Yes                                                    | Yes                                                       |
| Joly [80]                   | Cohort study                            | Retrospective                                               | NA                                                                                                                  | Yes                                      | No                                                | Unclear                                        | Unclear                                                            | No                                                     | Unclear                                                   |
| Kennedy Crispin et al. [81] | Cohort study                            | Retrospective                                               | NA                                                                                                                  | Yes                                      | Yes                                               | Yes                                            | Yes                                                                | Yes                                                    | Yes                                                       |

| Study                     | What is the study design of this study? | Was the study a prospective study or a retrospective study? | In case of a case-control study, were the groups similar at the outset of the study in terms of prognostic factors? | Was the intervention used appropriately? | Were the outcomes measured in the study reliable? | Were the outcomes measures in the study valid? | Was the statistical analysis conducted appropriately in the study? | Was the quality of reporting appropriate in the study? | Can the study results be generalized to routine practice? |
|---------------------------|-----------------------------------------|-------------------------------------------------------------|---------------------------------------------------------------------------------------------------------------------|------------------------------------------|---------------------------------------------------|------------------------------------------------|--------------------------------------------------------------------|--------------------------------------------------------|-----------------------------------------------------------|
| Kerkemeyer et al. [82]    | Case series                             | Retrospective                                               | NA                                                                                                                  | Yes                                      | Yes                                               | Yes                                            | Unclear                                                            | Unclear                                                | No                                                        |
| Kurosawa et al. [83]      | Cohort study                            | Retrospective                                               | NA                                                                                                                  | Unclear                                  | Yes                                               | Yes                                            | Yes                                                                | Yes                                                    | Unclear                                                   |
| Liu et al. [84]           | Cohort study                            | Retrospective                                               | NA                                                                                                                  | Yes                                      | Yes                                               | Yes                                            | Yes                                                                | Yes                                                    | Yes                                                       |
| Mackay-Wiggan et al. [85] | Cohort study                            | Prospective                                                 | NA                                                                                                                  | Unclear                                  | Yes                                               | Yes                                            | Yes                                                                | Yes                                                    | Unclear                                                   |
| Maryam et al. [86]        | Cohort study                            | Retrospective                                               | NA                                                                                                                  | Yes                                      | Unclear                                           | Unclear                                        | Unclear                                                            | Unclear                                                | Unclear                                                   |
| Park et al. [87]          | Case series                             | Retrospective                                               | NA                                                                                                                  | Yes                                      | Yes                                               | Yes                                            | Unclear                                                            | Unclear                                                | Unclear                                                   |
| Serdaroğlu et al. [88]    | Cohort study                            | Retrospective                                               | NA                                                                                                                  | Yes                                      | Yes                                               | Yes                                            | Unclear                                                            | Unclear                                                | Unclear                                                   |
| Shapiro et al. [89]       | Case series                             | Prospective                                                 | NA                                                                                                                  | Yes                                      | Unclear                                           | Yes                                            | Unclear                                                            | No                                                     | Unclear                                                   |
| Shin et al. [90]          | Cohort study                            | Retrospective                                               | NA                                                                                                                  | Unclear                                  | Yes                                               | Yes                                            | Yes                                                                | Yes                                                    | Unclear                                                   |
| Sriphojanart et al. [91]  | Cohort study                            | Retrospective                                               | NA                                                                                                                  | Yes                                      | Yes                                               | Yes                                            | Yes                                                                | Yes                                                    | Unclear                                                   |
| Vañó-Galvan et al. [92]   | Cohort study                            | Prospective                                                 | NA                                                                                                                  | Unclear                                  | Unclear                                           | Unclear                                        | Unclear                                                            | Unclear                                                | No                                                        |
| Vañó-Galvan et al. [93]   | Cohort study                            | Prospective                                                 | NA                                                                                                                  | Yes                                      | Yes                                               | Yes                                            | Unclear                                                            | Unclear                                                | Unclear                                                   |
| Wambier et al. [94]       | Case series                             | Retrospective                                               | NA                                                                                                                  | Yes                                      | Yes                                               | Yes                                            | Unclear                                                            | Unclear                                                | Unclear                                                   |
| Yoshimasu et al. [95]     | Cohort study                            | Prospective                                                 | NA                                                                                                                  | Unclear                                  | Yes                                               | Yes                                            | Unclear                                                            | No                                                     | No                                                        |
| Zhang et al. [96]         | Cohort study                            | Retrospective                                               | NA                                                                                                                  | Yes                                      | Yes                                               | Yes                                            | Yes                                                                | Yes                                                    | Yes                                                       |

ID, identifier; NA, not applicable.

## References for supporting information

1. Messenger A, McKillop J, Farrant P, McDonagh AJ, Sladden M. British Association of Dermatologists' guidelines for the management of alopecia areata 2012. *Br J Dermatol*. 2012;166:916–26.
2. Rossi A, Muscianese M, Piraccini BM, Starace M, Carlesimo M, Mandel VD, et al. Italian Guidelines in diagnosis and treatment of alopecia areata. *G Ital Dermatol Venereol*. 2019;154:609–23.
3. Cranwell WC, Lai VW, Photiou L, Meah N, Wall D, Rathnayake D, et al. Treatment of alopecia areata: an Australian expert consensus statement. *Australas J Dermatol*. 2019;60:163–70.
4. Meah N, Wall D, York K, Bhojru B, Bokhari L, Sigall DA, et al. The Alopecia Areata Consensus of Experts (ACE) study: Results of an international expert opinion on treatments for alopecia areata. *J Am Acad Dermatol*. 2020;83:123–30.
5. Abdallah MAE, Shareef R, Soltan MY. Efficacy of intradermal minoxidil 5% injections for treatment of patchy non-severe alopecia areata. *J Dermatolog Treat*. 2022;33:1126–9.
6. Açıkgöz G, Yeşil H, Çalışkan E, Tunca M, Akar A. Targeted photochemotherapy in alopecia areata. *Photodermatol Photoimmunol Photomed*. 2013;29:318–22.
7. Alkeraye S, Becquart C, Delaporte E, Staumont-Sallé D. Efficacy of combining pulse corticotherapy and methotrexate in alopecia areata: Real-life evaluation. *J Dermatol*. 2017;44:e319–e320.
8. Balakrishnan A, Joy B, Thyvalappil A, Mathew P, Sreenivasan A, Sridharan R. A comparative study of therapeutic response to intralesional injections of platelet-rich plasma versus triamcinolone acetonide in alopecia areata. *Indian Dermatol Online J*. 2020;11:920–4.
9. Bayramgürler D, Demirsoy EO, Aktürk A, Kiran R. Narrowband ultraviolet B phototherapy for alopecia areata. *Photodermatol Photoimmunol Photomed*. 2011;27:325–7.
10. Byun JW, Moon JH, Bang CY, Shin J, Choi GS. Effectiveness of 308-nm Excimer laser therapy in treating alopecia areata, determined by examining the treated sides of selected alopecic patches. *Dermatology*. 2015;231:70–6.

11. Devi M, Rashid A, Ghafoor R. Intralesional triamcinolone acetonide versus topical betamethasone vaealrate in the management of localized alopecia areata. *J Coll Physicians Surg Pak*. 2015;25:860–2.
12. El-Husseiny R, Elframawy S, Abdallah M. Comparative study between fractional carbon dioxide laser vs intralesional steroid injection in treatment of alopecia areata. *Dermatologic Therapy*. 2020;33:e13742.
13. El Khoury J, Abd-el-Baki J, Succariah F Abbas O, Kibbi AG, Kurban M. Topical immunomodulation with diphenylcyclopropenone for alopecia areata: the Lebanese experience. *Int J Dermatol*. 2013;52:1551–6.
14. El-Taweel AI, AKI EM. Intralesional pentoxifylline injection in localized alopecia areata. *J Cosmet Dermatol*. 2019;18:602–7.
15. Fiedler-Weiss VC. Topical minoxidil solution (1% and 5%) in the treatment of alopecia areata. *J Am Acad Dermatol*. 1987;16:745–8.
16. Georgala S, Katoulis AC, Befon A, Georgala K, Stavropoulos PG. Inosiplex for treatment of alopecia areata: a randomized placebo-controlled study. *Acta Derm Venereol*. 2006;86:422–4.
17. Giorgio CM, Babino G, Caccavale S, Russo T, De Rosa AB, Alfano R, et al. Combination of photodynamic therapy with 5-aminolaevulinic acid and microneedling in the treatment of alopecia areata resistant to conventional therapies: our experience with 41 patients. *Clin Exp Dermatol*. 2020;45:323–6.
18. Gupta M, Singh S, Khan B. Comparative evaluation of efficacy between topical calcipotriol used along with topical clobetasol and topical clobetasol monotherapy in treatment of alopecia areata: a randomised clinical trial. *J Clin Diagn Res*. 2021;15:WC05–WC08.
19. Gupta P, Verma KK, Khandpur S, Bhari N. Weekly azathioprine pulse versus betamethasone oral mini-pulse in the treatment of moderate-to-severe alopecia areata. *Indian J Dermatol*. 2019;64:292–8.
20. Guttman-Yassky E, Renert-Yuval Y, Bares J, Chima M, Hawkes JE, Gilleaudeau P, et al. Phase 2a randomized clinical trial of dupilumab (anti-IL-4R $\alpha$ ) for alopecia areata patients. *Allergy*. 2022;77:897–906.

21. Hamdino M, El-Barbary RA, Darwish HM. Intralesional methotrexate versus triamcinolone acetonide for localized alopecia areata treatment: A randomized clinical trial. *J Cosmet Dermatol.* 2022;21:707–15.
22. Hay IC, Jamieson M, Ormerod AD. Randomized trial of aromatherapy. Successful treatment for alopecia areata. *Arch Dermatol.* 1998;134:1349–52.
23. Jalali MHA, Mobasher P, Rabbani R, Jazi GA. Comparing the efficiency of elidel cream and elidel accompanied with tretinoin cream in treatment of alopecia areata. *J Skin Stem Cell.* 2014;1:e20108.
24. Kapoor P, Kumar S, Brar BK, Kukar N, Arora H, Brar SK. Comparative evaluation of therapeutic efficacy of intralesional injection of triamcinolone acetonide versus intralesional autologous platelet-rich plasma injection in alopecia areata. *J Cutan Aesthet Surg.* 2020;13:103–11.
25. Kerkemeyer KLS, Sinclair R. Treatment of chronic alopecia areata with tildrakizumab: an open-label pilot study. *Int J Dermatol.* 2020;59:e136–e137.
26. Kianfar N, Dasdar S, Mahmoudi H, Abedini R, Fahim S, Hosseini SA, et al. Comparison of the efficacy and safety of 308-nm excimer laser with intralesional corticosteroids for the treatment of alopecia areata: A randomized controlled study. *Lasers Surg Med.* 2022;54:502–10.
27. Lai VWY, Bokhari L, Sinclair R. Sublingual tofacitinib for alopecia areata: a roll-over pilot clinical trial and analysis of pharmacokinetics. *Int J Dermatol.* 2021;60:1135–9.
28. Lattouf C, Jimenez JJ, Tosti A, Miteva M, Wikramanayaki TC, Kittles C, et al. Treatment of alopecia areata with simvastatin/ezetimibe. *J Am Acad Dermatol.* 2015;72:359–61.
29. Li A, Meng X, Xing X, Tan H, Liu J, Li C. Efficacy and influence factors of 308-nm Excimer lamp with minoxidil in the treatment of alopecia areata. *Lasers Surg Med.* 2020;52:761–7.
30. Lim S-K, Lim C-A, Kwon IS, Im N, Seo Y-J, Kim C-J, et al. Low-dose systemic methotrexate therapy for recalcitrant alopecia areata. *Ann Dermatol.* 2017;29:263–7.
31. Mancuso G, Balducci A, Casadio C, Farina P, Staffa M, Valenti L, et al. Efficacy of betamethasone valerate foam formulation in comparison with betamethasone dipropionate lotion in the treatment of mild-to-moderate alopecia areata: a multicenter,

- prospective, randomized, controlled, investigator-blinded trial. *Int J Dermatol*. 2003;42:572–5.
32. Metwally D, Abdel-Fattah R, Hilal RF. Comparative study for treatment of alopecia areata using carboxy therapy, intralesional corticosteroids, and a combination of both. *Arch Dermatol Res*. 2022;314:167–82.
  33. Mikhaylov D, Pavel A, Yao C, Kimmel G, Nia J, Hashim P, et al. A randomized placebo-controlled single-center pilot study of the safety and efficacy of apremilast in subjects with moderate-to-severe alopecia areata. *Arch Dermatol Res*. 2019;311:29–36.
  34. Molinelli E, Campanati A, Brisigotti V, Sapigni C, Paolinelli M, Offidani A. Efficacy and safety of topical calcipotriol 0.005% versus topical clobetasol 0.05% in the management of alopecia areata: an intrasubject pilot study. *Dermatol Ther (Heidelb)*. 2020;10:515–21.
  35. Napolitano M, Cantelli M, Potestio L, Ocampo-Garza SS, Vastarella M, Nappa P, et al. Clinical, trichoscopic and in vivo reflectance confocal microscopy evaluation of alopecia areata in atopic dermatitis patients treated with dupilumab. *J Eur Acad Dermatol Venereol*. 2022;36:e561–e563.
  36. Narahari SR. Comparative efficacy of topical anthralin and intralesional triamcinolone in the treatment of alopecia areata. *Indian J Dermatol Venereol Leprol*. 1996;62:348–50.
  37. Ochoa BE, Sah D, Wang G, Stamper R, Price VH. Instilled bimatoprost ophthalmic solution in patients with eyelash alopecia areata. *J Am Acad Dermatol*. 2009;61:530–2.
  38. Ohtsuki A, Hasegawa T, Komiyama E, Takagi A, Kawasaki J, Ikeda S. 308-nm Excimer lamp for the treatment of alopecia areata: clinical trial on 16 cases. *Indian J Dermatol*. 2013;58:326.
  39. Olsen EA, Kornacki D, Sun K, Hordinsky MK. Ruxolitinib cream for the treatment of patients with alopecia areata: A 2-part, double-blind, randomized, vehicle-controlled phase 2 study. *J Am Acad Dermatol*. 2020;82:412–19.
  40. Park S-W, Kim J-W, Wang H-Y. Topical tacrolimus (FK506): treatment failure in four cases of alopecia universalis. *Acta Derm Venereol*. 2002;82:387–88.
  41. Price VH, Hordinsky MK, Olsen EA, Roberts JL, Siegfried EC, Rafal EY, et al. Subcutaneous efalizumab is not effective in the treatment of alopecia areata. *J Am Acad Dermatol*. 2008;58:395–402.

42. Rafati M, Mahmoudian R, Golpour M, Kazeminejad A, Saeedi M, Nekoukar Z. The effect of latanoprost 0.005% solution in the management of scalp alopecia areata, a randomized double-blind placebo-controlled trial. *Dermatol Ther.* 2022;35:e15450.
43. Ricar J, Cetkovska P, Hordinsky M, Ricarova R. Topical bimatoprost in the treatment of eyelash loss in alopecia totalis and universalis: A prospective, open-label study. *Dermatol Ther.* 2022;35:e15438.
44. Rigopoulos D, Gregoriou S, Korfitis C, Gintzou C, Vergou T, Katrinaki A, et al. Lack of response of alopecia areata to pimecrolimus cream. *Clin Exp Dermatol.* 2007;32:456–7.
45. Sanga ZN. Comparative study of efficacy of excimer light therapy vs. intralesional triamcinolone vs. topical 5% minoxidil for alopecia areata: an observational study. *Dermatol Rev/Przegląd Dermatologiczny.* 2015;102:206–10.
46. Singla A, Mittal RR, Walia RLS, Bansal IJS. Comparative efficacy of topical DNCB and puvasol therapy in alopecia areata. *Indian J Dermatol Venereol Leprol.* 1991;57:284–6.
47. Sirichotiyakul P, Meephanan J, Suchonwanit P. UV308 excimer lamp phototherapy for the treatment of alopecia areata: A randomized, self-controlled study. *Photodermatol Photoimmunol Photomed.* 2020;36:405–7.
48. Strober BE, Menon K, McMichael A, Hordinsky M, Krueger G, Panko J, et al. Alefacept for severe alopecia areata: a randomized, double-blind, placebo-controlled study. *Arch Dermatol.* 2022;145:1262–6.
49. Suchonwanit P, Kositkuljorn C, Mahasaksiri T, Leerunyakul K. A comparison of the efficacy and tolerability of three corticosteroid treatment regimens in patients with alopecia areata. *J Dermatolog Treat.* 2022;33:756–61.
50. Tanakol A, Oba MC, Uzuncakmak TK, Askin O, Kutlubay Z. Treatment of alopecia areata with 2940-nm fractional erbium:yttrium-aluminum-garnet laser. *Dermatol Ther.* 2020;33:e13978.
51. Taylor CR Hawk JL. PUVA treatment of alopecia areata partialis, totalis and universalis: audit of 10 years' experience at St John's Institute of Dermatology. *Br J Dermatol.* 1995;133:914–18.



52. Toma DM, Atallah RB, Eldahshan RM. Comparative study between topical methotrexate 1% gel and minoxidil 5% gel in the treatment of localized alopecia areata. *Dermatol Ther.* 2022;35:e15696.
53. Tosti A, Piraccini BM, Pazzaglia M, Vincenzi C. Clobetasol propionate 0.05% under occlusion in the treatment of alopecia totalis/universalis. *J Am Acad Dermatol.* 2003;49:96–8.
54. Tosti A, Iorizzo M, Botta GL, Milani M. Efficacy and safety of a new clobetasol propionate 0.05% foam in alopecia areata: a randomized, double-blind placebo-controlled trial. *J Eur Acad Dermatol Venereol.* 2006;20:1243–7.
55. Ustuner P, Balevi A, Özdemir M. Best dilution of the best corticosteroid for intralesional injection in the treatment of localized alopecia areata in adults. *J Dermatolog Treat.* 2017;28:753–61.
56. Vestey JP, Savin JA. A trial of 1% minoxidil used topically for severe alopecia areata. *Acta Derm Venereol.* 1986;66:179–80.
57. Weber B, Radakovic S, Tanew A. Apremilast for extensive and treatment-resistant alopecia areata: a retrospective analysis of five patients. *Eur J Dermatol.* 2020. <https://doi.org/10.1684/ejd.2020.3749>
58. White SI, Friedmann PS. Topical minoxidil lacks efficacy in alopecia areata. *Arch Dermatol.* 1985;121:591.
59. Whitmont KJ, Cooper AJ. PUVA treatment of alopecia areata totalis and universalis: a retrospective study. *Australas J Dermatol.* 2003;44:106–9.
60. Willemsen R, Haentjens P, Roseeuw D, Vanderlinden J. Hypnosis in refractory alopecia areata significantly improves depression, anxiety, and life quality but not hair regrowth. *J Am Acad Dermatol.* 2010;62:517–18.
61. Zaher H, Gawdat HI, Hegazy RA, Hassan M. Bimatoprost versus mometasone furoate in the treatment of scalp alopecia areata: a pilot study. *Dermatology.* 2015;230:308–13.
62. AlMarzoug A, AlOrainy M, AlTawil L, AlHayaza G, AlAnazi R, AlIssa A, et al. Alopecia areata and tofacitinib: a prospective multicenter study from a Saudi population. *Int J Dermatol.* 2022;61:886–94.

63. Alsufyani HS, Rawas WA, Alsufyani SS, Alsaadi FS, Felemban MS, Alqadi MM, et al. The effect of methotrexate in the treatment of alopecia areata. *Egypt J Hosp Med*. 2017;67:599–604.
64. Avgerinou G, Gregoriou S, Rigopoulos D, Stratigos A, Kalogeromitros D, Katsambas A. Alopecia areata: Topical immunotherapy treatment with diphencyprone. *J Eur Acad Dermatol Venereol*. 2008;22:320–3.
65. Case PC, Mitchell AJ, Swanson NA, Vanderveen EE, Ellis CN, Headington JJ. Topical therapy of alopecia areata with squaric acid dibutylester. *J Am Acad Dermatol*. 1984;10:447–50.
66. Chen YY, Lin SY, Chen YC, Yang CC, Lan CE. Low-dose tofacitinib for treating patients with severe alopecia areata: an efficient and cost-saving regimen. *Eur J Dermatol*. 2019;29:667–9.
67. Cheng MW, Kehl A, Worswick S, Goh C. Successful treatment of severe alopecia areata with oral or topical tofacitinib. *J Drugs Dermatol*. 2018;17:800–3
68. Cotellessa C, Peris K, Caracciolo E, Mordenti C, Chimenti S. The use of topical diphenylcyclopropenone for the treatment of extensive alopecia areata. *J Am Acad Dermatol*. 2001;44:73–6.
69. Dehghan M, Alborzi A, Shahini N. Comparison of oral prednisolone pulse therapy with intravenous methylprednisolone pulse therapy in severe alopecia areata. *J Pakistan Assoc Dermatologists*. 2013;23:159–62.
70. Dincer Rota D, Emeksiz MAC, Erdogan FG, Yildirim D. Experience with oral tofacitinib in severe alopecia areata with different clinical responses. *J Cosmet Dermatol*. 2021;20:3026–33.
71. English J, Heinisch S. Methotrexate treatment for alopecia areata with greater than 50% involvement. *Hair Ther Transplant*. 2015;5:2.
72. Ferrando J, Grimalt R. Partial response of severe alopecia areata to cyclosporine A. *Dermatology*. 1999;199:67–9.
73. Firooz A, Fouladi D. Methotrexate plus prednisolone in severe alopecia areata. *Am J Drug Dis Dev*. 2013;3:188–93.

74. Gupta AK, Ellis CN, Cooper KD, Nickoloff BJ, Ho VC, Chan LS, et al. Oral cyclosporine for the treatment of alopecia areata: a clinical and immunohistochemical analysis. *J Am Acad Dermatol.* 1990;22:242–50.
75. Hogan S, Wang S, Ibrahim O, Piliang M, Bergfeld W. Long-term treatment with tofacitinib in severe alopecia areata: an update. *J Clin Aesthet Dermatol.* 2019;12:12–14.
76. Hull SM, Norris JF. Diphenacyclone in the treatment of long-standing alopecia areata. *Br J Dermatol.* 1988;119:367–74.
77. Ibrahim O, Bayart CB, Hogan S, Piliang M, Bergfeld WF. Treatment of alopecia areata with tofacitinib. *JAMA Dermatol.* 2017;153:600–2.
78. Jabbari A, Sansaricq F, Cerise J, Chen JC, Bitterman A, Ulerio G, et al. An open-label pilot study to evaluate the efficacy of tofacitinib in moderate to severe patch-type alopecia areata, totalis, and universalis. *J Invest Dermatol.* 2018;138:1539–45.
79. Jang YH, Kim SL, Lee KC, Kim MJ, Park KH, Lee WJ, et al. A comparative study of oral cyclosporine and betamethasone minipulse therapy in the treatment of alopecia areata. *Ann Dermatol.* 2016;28:569–74.
80. Joly P. The use of methotrexate alone or in combination with low doses of oral corticosteroids in the treatment of alopecia totalis or universalis. *J Am Acad Dermatol.* 2006;55:632–36.
81. Kennedy Crispin M, Ko JM, Craiglow BG, Li S, Shankar G, Urban JR, et al. Safety and efficacy of the JAK inhibitor tofacitinib citrate in patients with alopecia areata. *JCI Insight.* 2016;1:e89776.
82. Kerkemeyer KLS, John JM, Sinclair R, Bhoyrul B. Response of alopecia areata of the beard to oral tofacitinib. *J Am Acad Dermatol.* 2020;82:1228–30.
83. Kurosawa M, Nakagawa S, Mizuashi M, Sasaki Y, Kawamura M, Saito M, et al. A comparison of the efficacy, relapse rate and side effects among three modalities of systemic corticosteroid therapy for alopecia areata. *Dermatology.* 2006;212:361–65.
84. Liu LY, Craiglow BG, Dai F, King BA. Tofacitinib for the treatment of severe alopecia areata and variants: A study of 90 patients. *J Am Acad Dermatol.* 2017;76:22–8.

85. Mackay-Wiggan J, Jabbari A, Nguyen N, Cerise JE, Clark C, Ulerio G, et al. Oral ruxolitinib induces hair regrowth in patients with moderate-to-severe alopecia areata. *JCI Insight*; 2016;1: e89790.
86. Maryam A, Hassan S, Farshad F, Parastoo B, Vahide L. The efficacy of topical diphencyprone in the treatment of alopecia areata. *Indian J Dermatol*. 2009;54:88–9.
87. Park H-S, Kim M-W, Lee JS, Yoon H-S, Huh C-Y, Kwon O, et al. Oral tofacitinib monotherapy in Korean patients with refractory moderate-to-severe alopecia areata: A case series. *J Am Acad Dermatol*. 2017;77:978–80. Erratum: *J Am Acad Dermatol*. 2018;78:431.
88. Serdaroğlu S, Engin B, Çelik U, Erkan E, Aşkin Ö, Oba Ç, et al. Clinical experiences on alopecia areata treatment with tofacitinib: A study of 63 patients. *Dermatol Ther*. 2019;32:e12844.
89. Shapiro J, Lui H, Tron V, Ho V. Systemic cyclosporine and low-dose prednisone in the treatment of chronic severe alopecia areata: a clinical and immunopathologic evaluation. *J Am Acad Dermatol*. 1997;36:114–17.
90. Shin J-W, Huh C-H, Kim M-W, Lee J-S, Kwon O, Cho S, et al. Comparison of the treatment outcome of oral tofacitinib with other conventional therapies in refractory alopecia totalis and universalis: A retrospective study. *Acta Derm Venereol*. 2018;99:41–6.
91. Sriphojanart T, Khunkhet S, Suchonwanit P. A retrospective comparative study of the efficacy and safety of two regimens of diphenylcyclopropenone in the treatment of recalcitrant alopecia areata. *Dermatol Rep*. 2017;9:55–8
92. Vañó-Galván S, Hermosa-Gelbard A, Sánchez-Neila N, Miguel-Gómez L, Saceda-Corralo D, Rodrigues-Barata R, et al. Treatment of recalcitrant adult alopecia areata universalis with oral azathioprine. *J Am Acad Dermatol*. 2016;74:1007–8.
93. Vañó-Galván S, Hermoza-Gelmard A, Sánchez-Neila A, Miguel-Gómez L, Saceda-Corralo D, Rodrigues-Barata M, et al. Pulse corticosteroid therapy with oral dexamethasone for the treatment of adult alopecia totalis and universalis. *J Am Acad Dermatol*. 2016;74:1005–7.
94. Wambier CG, Craiglow BG, King BA. Combination tofacitinib and oral minoxidil treatment for severe alopecia areata. *J Am Acad Dermatol*. 2021;85:743–5.

95. Yoshimasu T, Kanazawa N, Yamamoto Y, Furukawa F. Multiple courses of pulse corticosteroid therapy for alopecia areata. *J Dermatol.* 2016;43:1075–7.
96. Zhang W, Li X, Chen B, Zhang J, Torres-Culala KMT, Zhou C. Oral tofacitinib and systemic corticosteroids, alone or in combination, in patients with moderate-to-severe alopecia areata: a retrospective study. *Front Med (Lausanne).* 2022;9:891434.
